# Supplementary material
Source: PubMed Central journal article supplement (PMC7193670)

**Base-Mediated Meerwein–Ponndorf–Verley Reduction  
of Aromatic and Heterocyclic Ketones**

Timothy B. Boit, Milauni M. Mehta, and Neil K. Garg\*

*Department of Chemistry and Biochemistry, University of California  
Los Angeles, California 90095*

Supporting Information – Table of Contents

|                                                                                       |            |
|---------------------------------------------------------------------------------------|------------|
| <b>Materials and Methods .....</b>                                                    | <b>S2</b>  |
| <b>Experimental Procedures .....</b>                                                  | <b>S4</b>  |
| <b>A. Syntheses of Ketone Substrates.....</b>                                         | <b>S4</b>  |
| <b>B. Synthesis of Alcohol Reductant 5.....</b>                                       | <b>S5</b>  |
| <b>C. Synthesis of Enantioenriched Alcohol Reductant (<i>R</i>)-5.....</b>            | <b>S6</b>  |
| <b>D. Initial Survey of Reaction Conditions and Relevant Control Experiments.....</b> | <b>S7</b>  |
| <b>E. Trace Metal Analysis of K<sub>3</sub>PO<sub>4</sub>.....</b>                    | <b>S9</b>  |
| <b>F. Scope of Methodology .....</b>                                                  | <b>S12</b> |
| <b>G. Gram-Scale Reduction .....</b>                                                  | <b>S19</b> |
| <b>H. Stereospecific Reduction .....</b>                                              | <b>S20</b> |
| <b>I. Verification of Enantiopurity.....</b>                                          | <b>S21</b> |
| <br>                                                                                  |            |
| <b>References.....</b>                                                                | <b>S24</b> |
| <br>                                                                                  |            |
| <b><sup>1</sup>H NMR Spectra .....</b>                                                | <b>S26</b> |
| <b><sup>13</sup>C NMR Spectra... ..</b>                                               | <b>S45</b> |

**Materials and Methods.** Unless stated otherwise, reactions were conducted in flame-dried glassware under an atmosphere of nitrogen or argon and commercially obtained reagents were used as received. Not-commercially available ketone substrates were synthesized following protocols specified in Section A in the Experimental Procedures. Alcohols **5** and (*R*)-**5** were synthesized following protocols specified in Section B and C in the Experimental Procedures, respectively. 1,2-Dichloroethane, 1,4-dioxane, and isopropanol were obtained from Fischer Scientific and purified by distillation. 3-Pentanol (**3**) and 1-phenylethanol (**4**) were obtained from Sigma-Aldrich and purified by distillation. Prior to use, 1,4-dioxane, isopropanol, 3-pentanol (**3**) and 1-phenylethanol (**4**) were degassed by sparging with N<sub>2</sub> for 1 h. Ketone **1**<sup>1</sup> and **36**<sup>2</sup> were prepared according to literature procedures. **22**, **28**, **29**, **30**, **31**, and **34** were obtained from Sigma-Aldrich. **26**, **21**, **27**, **32**, **35**, and **37** was obtained from Combi-Blocks. Ketone **26** was obtained from Oxchem. Ketone **33** was obtained from Alfa Aesar. Pd(PPh<sub>3</sub>)<sub>4</sub> (99%) was obtained from Strem Chemicals. Acetyltrimethylsilane (**23**) (97%) was obtained from Sigma-Aldrich. Cesium fluoride (99%+) was obtained from Strem Chemicals. Potassium phosphate (K<sub>3</sub>PO<sub>4</sub>) was obtained from Acros. Reaction temperatures were controlled using an IKAmag temperature modulator, and unless stated otherwise, reactions were performed at room temperature (approximately 23 °C). Thin-layer chromatography (TLC) was conducted with EMD gel 60 F254 pre-coated plates (0.25 mm for analytical chromatography and 0.50 mm for preparative chromatography) and visualized using a combination of UV, anisaldehyde, iodine, and potassium permanganate staining techniques. Silicycle Siliaflash P60 (particle size 0.040–0.063 mm) was used for flash column chromatography. <sup>1</sup>H NMR spectra were recorded on Bruker spectrometers (at 300, 400, 500, and 600 MHz) and are reported relative to residual solvent signals. Data for <sup>1</sup>H NMR spectra are reported as follows: chemical shift (δ ppm), multiplicity, coupling constant (Hz), integration. Data for <sup>13</sup>C NMR are reported in terms of chemical shift (at 75 and 125 MHz). IR spectra were recorded on a Perkin-Elmer UATR Two FT-IR spectrometer and are reported in terms of frequency absorption (cm<sup>-1</sup>). DART-MS spectra were collected on a Thermo Exactive Plus MSD (Thermo Scientific) equipped with an ID-CUBE ion source and a Vapor Interface (IonSense Inc.). Both the source and MSD were controlled by Excalibur software v. 3.0. The analyte was spotted onto OpenSpot sampling cards (IonSense Inc.) using CHCl<sub>3</sub> or CH<sub>2</sub>Cl<sub>2</sub> as the solvent. Ionization was accomplished using UHP He plasma with no additional ionization agents. The mass calibration was carried out using Pierce LTQ Velos ESI (+) and (-) Ion

calibration solutions (Thermo Fisher Scientific). Optical rotations were measured with a Rudolf Autopol III Automatic Polarimeter. Trace metal analysis was determined by inductively coupled plasma mass spectrometry on an Agilent 8800 Triple Quadrupole ICP-MS instrument. The level of all analytes of interest was determined in MS/MS mode, measured using He in the collision/reaction cell using an environmental calibration standard (elements not included in this standard: B, Ti, Rb, Ru, Rh, Pd, Ir, and Pt). The quantification was done using the ICP-MS MassHunter WorkStation v4.3, through the QuickScan acquisition. Nitric acid was obtained from Fisher Scientific (A467500). Determination of enantiopurity was carried out on a Mettler Toledo SFC (supercritical fluid chromatography) or Agilent HPLC (high performance liquid chromatography) using Daicel ChiralPak IC-3 and Daicel ChiralPak OD-H columns. Data for SFC and HPLC spectra are reported in enantiomeric excess (ee). For SFC and HPLC chromatograms see Section I of Experimental Procedures.

## Experimental Procedures

### A. Syntheses of Ketone Substrates

**Representative Procedure for the Synthesis of Ketone Substrates (synthesis of ketone **24** is used as an example).**

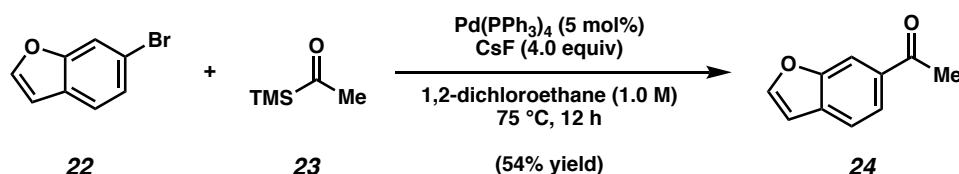

A flame-dried 1-dram vial was charged 6-bromobenzofuran (**22**) (130 mg, 0.660 mmol, 1.00 equiv) and a magnetic stir bar. In the glove box, CsF (401 mg, 2.64 mmol, 4.00 equiv) and Pd(PPh<sub>3</sub>)<sub>4</sub> (38.1 mg, 0.0330 mmol, 0.0500 equiv) were added to the vial. The vessel was removed from the glove box and placed under an atmosphere of N<sub>2</sub> on the bench. Distilled 1,2-dichloroethane (0.700 mL, 1.00 M) and silane **23** (189 μL, 1.32 mmol, 2.0 equiv) were added and the vial was sealed with a Teflon-lined screw cap. The heterogeneous mixture was heated to 75 °C for 12 h. After cooling to 23 °C, the mixture was diluted with hexanes (0.5 mL), filtered over a plug of silica gel (1.00 cm OD x 5.00 cm, 10 mL EtOAc eluent), and the volatiles were removed under reduced pressure. The crude residue was purified by flash chromatography (19:1 Hexanes:EtOAc → 14:1 Hexanes:EtOAc) to yield ketone **24** (57.0 mg, 54% yield) as a yellow oil. Ketone **24**: R<sub>f</sub> 0.42 (5:1 Hexanes:EtOAc); <sup>1</sup>H NMR (600 MHz, CDCl<sub>3</sub>): δ 8.13 (s, 1H), 7.89 (dd, *J* = 8.30, 1.38 Hz, 1H), 7.79 (d, *J* = 2.17 Hz, 1H), 7.66 (d, *J* = 8.30 Hz, 1H), 6.87–6.89 (m, 1H), 2.67 (s, 3H); <sup>13</sup>C NMR (125 MHz, CDCl<sub>3</sub>): δ 197.8, 154.8, 148.4, 134.0, 132.0, 123.3, 121.2, 112.0, 107.0, 27.0; IR (film): 3118, 3003, 1673, 1425, 1271 cm<sup>-1</sup>; HRMS-APCI (*m/z*) [M+NH<sub>4</sub>]<sup>+</sup> calcd for C<sub>10</sub>H<sub>12</sub>O<sub>2</sub>N<sup>+</sup>, 178.08626; found 178.08536.

Note: Supporting information for the synthesis of ketone **36** has previously been reported.<sup>2</sup> The synthesis of the remaining substrate, **20**, is as follows:

*Any modifications of the conditions shown in the representative procedure above are specified in the following scheme.*

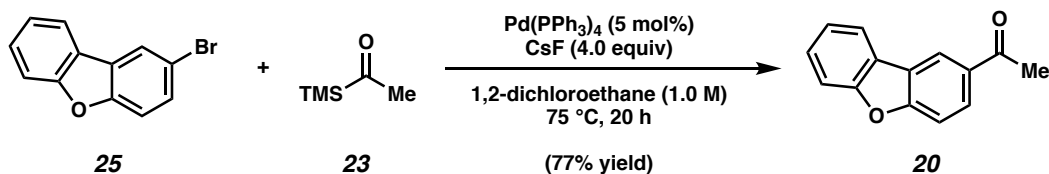

**Ketone 20.** Purification by flash chromatography (49:1 Hexanes:EtOAc) generated ketone **20** (263 mg, 77% yield) as a white solid. Ketone **20**:  $R_f$  0.33 (9:1 Hexanes:EtOAc). Spectral data match those previously reported.<sup>3</sup>

### B. Synthesis of Alcohol Reductant 5

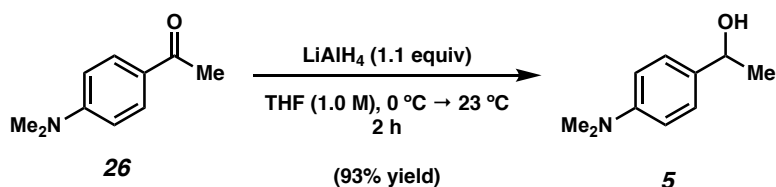

To a flame-dried flask equipped with a magnetic stir bar was added  $\text{LiAlH}_4$  (2.56 g, 67.4 mmol, 1.10 equiv) in a glovebox. The flask was removed from the glovebox, THF (61.0 mL) was added, and the solution was cooled to 0 °C. To the solution was then added ketone **26** (2.00 g, 61.5 mmol each, 0.200 equiv) in 5 aliquots over 25 min. The reaction was then warmed to 23 °C. After stirring for 2 h, the reaction was cooled to 0 °C and quenched by the sequential addition of deionized water (5 mL), 10% aq. NaOH (7 mL), MeOH (20 mL), and deionized water (10 mL). The mixture was then warmed to 23 °C and stirred for 30 min. The mixture was then filtered over a pad of celite (100 mL EtOAc eluent). The resulting organic layer was dried over  $\text{Na}_2\text{SO}_4$ , filtered, and the volatiles were removed under reduced pressure. The crude residue was purified by flash chromatography (5:1 Hexanes:EtOAc → 3:1 Hexanes:EtOAc) to yield alcohol **5** (9.42 g, 93% yield) as a white solid. Alcohol **5**:  $R_f$  0.33 (3:1 Hexanes:EtOAc). Spectral data match those previously reported.<sup>4</sup>

C. Synthesis of Enantioenriched Alcohol Reductant (*R*)-5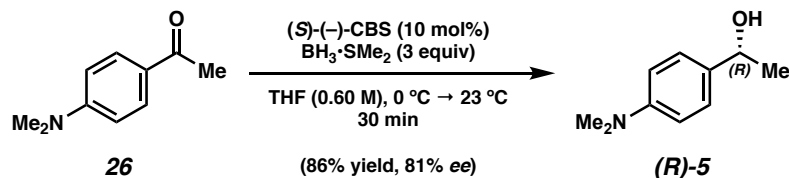

To a flame-dried flask equipped with a magnetic stir bar was added (*S*)-(-)-CBS catalyst (170 mg, 0.613 mmol, 0.100 equiv). The flask was removed from the glovebox and THF (6.13 mL) was added. Next, **26** (1.00 g, 6.13 mmol, 1.00 equiv) in a solution of THF (2.50 mL) was added to the reaction flask, which was then stirred to give a clear homogeneous solution and cooled to 0 °C. Subsequently,  $\text{BH}_3\cdot\text{SMe}_2$  (1.70 mL, 18.4 mmol, 3.00 equiv) was added (1 drop/2 sec) over 7.50 min. The reaction was stirred at 0 °C for 2 min, then warmed to 23 °C. After stirring for 30 min, the reaction was cooled to 0 °C and quenched by the dropwise addition of methanol (20 mL) and water (20 mL) and diluted with  $\text{Et}_2\text{O}$  (50 mL). The layers were separated and the aqueous layer was extracted with  $\text{Et}_2\text{O}$  (3 x 50 mL). The combined organic layers were washed with sat. aq.  $\text{NH}_4\text{Cl}$  (80 mL), sat. aq.  $\text{NaHCO}_3$  (80 mL), and brine (80 mL). The organic layer was then dried over  $\text{Na}_2\text{SO}_4$ , filtered, and the volatiles were removed under reduced pressure. The crude residue was purified by flash chromatography (10:1 Hexanes:EtOAc  $\rightarrow$  3:1 Hexanes:EtOAc) to yield alcohol (*R*)-5 (871 mg, 86% yield, 81% ee) as a white solid. Alcohol (*R*)-5:  $R_f$  0.33 (3:1 Hexanes:EtOAc). The spectral data match those previously reported in the literature for *rac*-5.<sup>4</sup> The SFC data match those reported in the Experimental Procedures Section G.

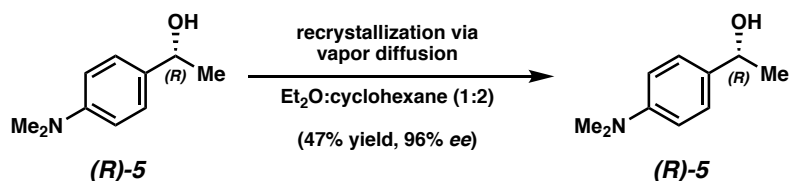

A solution of (*R*)-5 (25.0 mg, 0.151 mmol, 1.00 equiv) in  $\text{Et}_2\text{O}$  (1.00 mL) was filtered through a 0.45  $\mu\text{m}$  Millipore Millex PTFE filter into a 1-dram vial. The vial was then placed within a 20 mL scintillation vial containing cyclohexane (2.00 mL). The scintillation vial was sealed and allowed to stand at 23 °C for 24 h, which led to the formation of white crystals. This vapor

diffusion crystallization process was repeated three times to lead to the recovery of alcohol (**R**)-**5** (11.8 mg, 47% yield, 96% ee) as a white crystalline solid.  $[\alpha]_D^{23.1} = +51.6$  ( $c = 1.00$ ,  $\text{CHCl}_3$ ). The spectral data match those previously reported in the literature for *rac*-**5**.<sup>4</sup> The major enantiomer product was assigned by comparison to published  $[\alpha]_D$  values for (**R**)-**5**.<sup>5</sup>

#### D. Survey of Reaction Conditions and Relevant Control Experiments

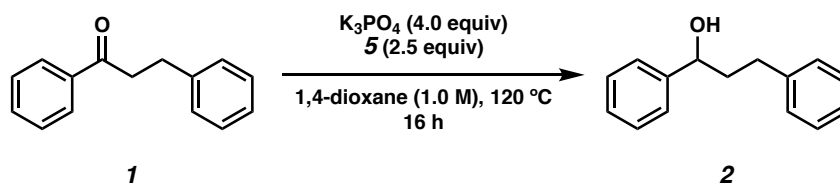

**Representative Procedure for Base-Mediated MPV Reduction from Table S1 (reduction of ketone 1 with alcohol 5 is used as an example).** A 1-dram vial was charged with anhydrous powdered  $\text{K}_3\text{PO}_4$  (85.0 mg, 0.400 mmol, 4.00 equiv) and a magnetic stir bar. The vial and its contents were flame-dried under reduced pressure, then allowed to cool under  $\text{N}_2$ . Ketone substrate **1** (21.0 mg, 0.100 mmol, 1.00 equiv) and alcohol reductant **5** (41.3 mg, 0.250 mmol, 2.50 equiv) were added. The vial was flushed with  $\text{N}_2$ , and then 1,4-dioxane (0.100 mL, 1.00 M) was added. Under a stream of  $\text{N}_2$ , the vial septum cap was quickly switched for a Teflon-lined screw cap, sealed, then further sealed with electrical tape. The reaction was stirred vigorously (800 rpm) at 120 °C for 16 h. After cooling to 23 °C, the mixture was diluted with hexanes (0.5 mL) and filtered over a plug of silica gel (1 cm OD x 5 cm, 10 mL EtOAc eluent). The volatiles were removed under reduced pressure and the yield of alcohol **2** was determined by  $^1\text{H}$  NMR analysis with 1,3,5-trimethoxybenzene as an external standard.

*Any modifications of the conditions shown in the representative procedure above are specified below in Table S1.*

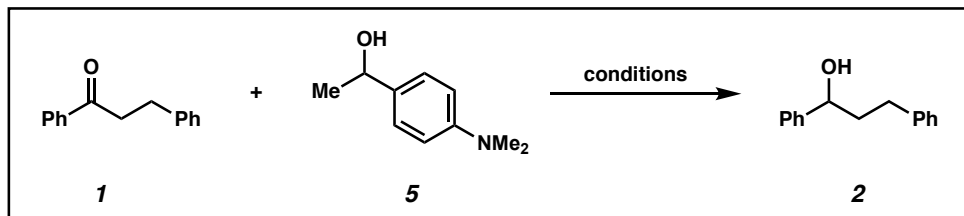

| Reaction Conditions                                                                                                               | Experimental Results <sup>a</sup> |     |
|-----------------------------------------------------------------------------------------------------------------------------------|-----------------------------------|-----|
|                                                                                                                                   | 1                                 | 2   |
| 5 (2.5 equiv), K <sub>3</sub> PO <sub>4</sub> (4.0 equiv), dioxane (1.0 M), 120 °C, 16 h                                          | 0%                                | 99% |
| 5 (2.5 equiv), K <sub>3</sub> PO <sub>4</sub> (4.0 equiv), dioxane (1.0 M), 80 °C, 16 h                                           | 0%                                | 99% |
| 5 (2.5 equiv), K <sub>3</sub> PO <sub>4</sub> (4.0 equiv), dioxane (1.0 M), 120 °C, 3 h                                           | <5%                               | 98% |
| 5 (2.5 equiv), K <sub>3</sub> PO <sub>4</sub> (4.0 equiv), 2-Me THF (1.0 M), 80 °C, 16 h                                          | 0%                                | 99% |
| 5 (2.5 equiv), K <sub>3</sub> PO <sub>4</sub> (4.0 equiv), <i>t</i> -amyl alcohol (1.0 M), 80 °C, 16 h                            | <5%                               | 98% |
| 5 (2.5 equiv), K <sub>3</sub> PO <sub>4</sub> (4.0 equiv), <i>n</i> -heptane (1.0 M), 80 °C, 16 h                                 | 11%                               | 89% |
| <b>Control Experiments:</b>                                                                                                       |                                   |     |
| 5 (2.5 equiv), K <sub>3</sub> PO <sub>4</sub> (4.0 equiv), dioxane (1.0 M), 120 °C, 16 h<br><i>Ran in the dark</i>                | 0%                                | 99% |
| 5 (2.5 equiv), K <sub>3</sub> PO <sub>4</sub> (4.0 equiv), H <sub>2</sub> O (2.0 equiv),<br>dioxane (1.0 M), 120 °C, 16 h         | <5%                               | 95% |
| 5 (2.5 equiv), K <sub>3</sub> PO <sub>4</sub> (4.0 equiv), dioxane (1.0 M), 120 °C, 16 h<br><i>Ran under an atmosphere of air</i> | 12%                               | 88% |

<sup>a</sup> Yields were determined by <sup>1</sup>H NMR analysis using 1,3,5-trimethoxybenzene as an external standard.

**Table S1.** Survey of Reaction Conditions and Relevant Control Experiments



### E. Trace Metal Analysis

**Representative Procedure for Trace Metal Analysis (preparation of  $K_3PO_4$  is used as an example).** A 15-mL conical tube was charged with  $K_3PO_4$  (95.2 mg, 1.00 equiv) and the sample was diluted with milli-Q water (6.8 mL) to a final concentration of 1.4% (w/w). Subsequently, ICP-MS-grade 70% nitric acid (200  $\mu$ l) was added to each sample (2% final nitric acid concentration).

| <b>Sample: <math>K_3PO_4</math></b> |                                                         |
|-------------------------------------|---------------------------------------------------------|
| <b>Metal</b>                        | <b>Concentration (ppm)<br/>(average of two samples)</b> |
| <b>Fe</b>                           | 0.00809                                                 |
| <b>Al</b>                           | 0.000                                                   |
| <b>Co</b>                           | 0.000                                                   |
| <b>B</b>                            | 0.0240                                                  |
| <b>Ti</b>                           | 0.0420                                                  |
| <b>Mg</b>                           | 0.00189                                                 |
| <b>Mn</b>                           | $7.84 \times 10^{-5}$                                   |
| <b>Sc</b>                           | 0.000                                                   |
| <b>Rb</b>                           | 0.203                                                   |
| <b>Ni</b>                           | 0.0303                                                  |
| <b>Cu</b>                           | 0.000                                                   |
| <b>Zn</b>                           | 0.000                                                   |
| <b>Ru</b>                           | $9.46 \times 10^{-6}$                                   |
| <b>Rh</b>                           | 0.000                                                   |
| <b>Pd</b>                           | $1.53 \times 10^{-5}$                                   |
| <b>Ag</b>                           | 0.000                                                   |
| <b>Ir</b>                           | $1.17 \times 10^{-6}$                                   |
| <b>Pt</b>                           | 0.000                                                   |

| <b>Sample: 1,4-dioxane</b> |                                                         |
|----------------------------|---------------------------------------------------------|
| <b>Metal</b>               | <b>Concentration (ppm)<br/>(average of two samples)</b> |
| <b>Fe</b>                  | 0.00369                                                 |
| <b>Al</b>                  | 0.00384                                                 |
| <b>Co</b>                  | 0.000130                                                |
| <b>B</b>                   | 0.00570                                                 |
| <b>Ti</b>                  | 0.00250                                                 |
| <b>Mg</b>                  | 0.01780                                                 |
| <b>Mn</b>                  | 0.000151                                                |
| <b>Sc</b>                  | 0.00190                                                 |
| <b>Rb</b>                  | $3.41 \times 10^{-5}$                                   |
| <b>Ni</b>                  | 0.354                                                   |
| <b>Cu</b>                  | 0.000                                                   |
| <b>Zn</b>                  | 0.000                                                   |
| <b>Ru</b>                  | 0.000                                                   |
| <b>Rh</b>                  | 0.000                                                   |
| <b>Pd</b>                  | $1.06 \times 10^{-5}$                                   |
| <b>Ag</b>                  | $2.85 \times 10^{-5}$                                   |
| <b>Ir</b>                  | 0.000                                                   |
| <b>Pt</b>                  | 0.000                                                   |

| <b>Sample: Alcohol Reductant 5</b> |                                                         |
|------------------------------------|---------------------------------------------------------|
| <b>Metal</b>                       | <b>Concentration (ppm)<br/>(average of two samples)</b> |
| <b>Fe</b>                          | 0.00352                                                 |
| <b>Al</b>                          | 0.00121                                                 |
| <b>Co</b>                          | $3.20 \times 10^{-5}$                                   |
| <b>B</b>                           | 0.0211                                                  |
| <b>Ti</b>                          | 0.000642                                                |
| <b>Mg</b>                          | 0.0125                                                  |
| <b>Mn</b>                          | $1.81 \times 10^{-5}$                                   |
| <b>Sc</b>                          | 0.000962                                                |
| <b>Rb</b>                          | $5.15 \times 10^{-6}$                                   |
| <b>Ni</b>                          | 0.113                                                   |
| <b>Cu</b>                          | 0.000                                                   |
| <b>Zn</b>                          | 0.000                                                   |
| <b>Ru</b>                          | 0.000                                                   |
| <b>Rh</b>                          | $9.31 \times 10^{-7}$                                   |
| <b>Pd</b>                          | $3.00 \times 10^{-6}$                                   |
| <b>Ag</b>                          | $7.91 \times 10^{-6}$                                   |
| <b>Ir</b>                          | 0.000                                                   |
| <b>Pt</b>                          | $1.76 \times 10^{-6}$                                   |

## F. Scope of Methodology

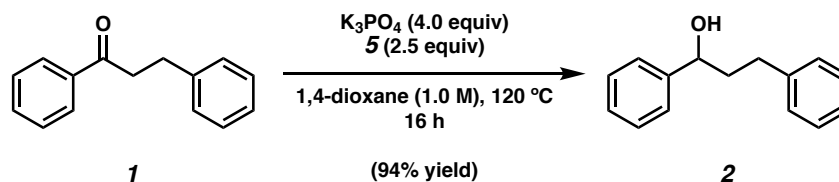

**Representative Procedure for Base-Mediated MPV Reduction from Figure 2 (reduction of ketone **1** with alcohol **5** is used as an example). Alcohol **2**.** A 1-dram vial was charged with anhydrous powdered  $\text{K}_3\text{PO}_4$  (85.0 mg, 0.400 mmol, 4.00 equiv) and a magnetic stir bar. The vial and its contents were flame-dried under reduced pressure, then allowed to cool under  $\text{N}_2$ . Ketone substrate **1** (21.0 mg, 0.100 mmol, 1.00 equiv) and alcohol reductant **5** (41.3 mg, 0.250 mmol, 2.50 equiv) were added. The vial was purged with  $\text{N}_2$ , and then 1,4-dioxane (0.100 mL, 1.00 M) was added. Under a stream of  $\text{N}_2$ , the vial septum cap was quickly switched for a Teflon-lined screw cap, sealed, then further sealed with electrical tape. The reaction was stirred vigorously (800 rpm) at 120 °C for 16 h. After cooling to 23 °C, the reaction was quenched by the addition of sat. aq.  $\text{NH}_4\text{Cl}$  (1.00 mL) and diluted with EtOAc (2.00 mL) and the layers were separated. The aqueous layer was extracted with EtOAc (3 x 2.00 mL) and the combined organic layers were passed through a plug (1.00 cm OD) of silica gel (3.00 cm tall) and  $\text{Na}_2\text{SO}_4$  (3.00 cm tall) using EtOAc (10.0 mL) as eluent. The volatiles were removed under reduced pressure. The crude residue was purified by flash chromatography (99:1 Hexanes:EtOAc  $\rightarrow$  19:1 Hexanes:EtOAc) to yield alcohol **2** (20 mg, 94% yield, average of two experiments) as a clear oil. Alcohol **2**:  $R_f$  0.32 (5:1 Hexanes:EtOAc).  $^1\text{H}$  NMR (500 MHz,  $\text{CDCl}_3$ ):  $\delta$  7.41–7.33 (m, 4H), 7.32–7.26 (m, 3H), 7.23–7.16 (m, 3H), 4.78–4.61 (m, 1H), 2.85–2.61 (m, 2H), 2.23–1.97 (m, 2H), 1.87 (d,  $J = 3.5$  Hz, 1H). Spectral data match those previously reported.<sup>6</sup>

*Any modifications of the conditions shown in the representative procedure above are specified in the following schemes, which depict all of the results shown in Figures 2 and 3.*

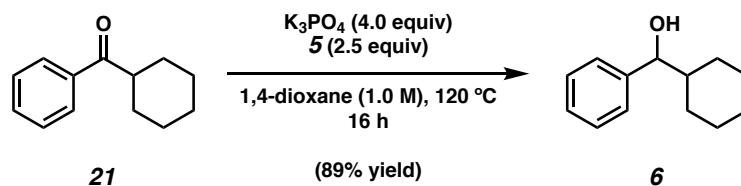

**Alcohol 6.** Purification by flash chromatography (99:1 Hexanes:EtOAc  $\rightarrow$  19:1 Hexanes:EtOAc) generated alcohol **6** (17 mg, 89% yield, average of two experiments) as a crystalline white solid. Alcohol **6**:  $R_f$  0.39 (5:1 Hexanes:EtOAc).  $^1\text{H}$  NMR (500 MHz,  $\text{CDCl}_3$ ):  $\delta$  7.38–7.25 (m, 5H), 4.37 (dd,  $J = 7.2$  Hz, 3.3 Hz, 1H), 2.03–1.92 (m, 1H), 1.84–1.72 (m, 2H), 1.71–1.57 (m, 3H), 1.41–1.33 (m, 1H), 1.29–1.00 (m, 4H), 0.99–0.87 (m, 1H). Spectral data match those previously reported.<sup>7</sup>

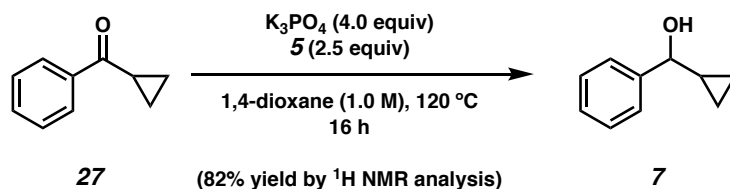

**Alcohol 7.**  $^1\text{H}$  NMR analysis of the crude reaction mixture indicated an 82% yield of alcohol **7** relative to hexamethylbenzene external standard (average of two experiments). Purification by preparative thin-layer chromatography (3:1 Hexanes:EtOAc) provided an analytical sample of alcohol **7** as a clear oil. Alcohol **7**:  $R_f$  0.30 (5:1 Hexanes:EtOAc).  $^1\text{H}$  NMR (500 MHz,  $\text{CDCl}_3$ ):  $\delta$  7.46–7.40 (m, 2H), 7.39–7.33 (m, 2H), 7.32–7.27 (m, 1H), 4.02 (dd,  $J = 8.3, 3.0$ , 1H), 1.90 (d,  $J = 3.0$ , 1H), 1.28–1.18 (m, 1H), 0.69–0.61 (m, 1H), 0.60–0.52 (m, 1H), 0.52–0.44 (m, 1H), 0.42–0.34 (m, 1H). Spectral data match those previously reported.<sup>8</sup>

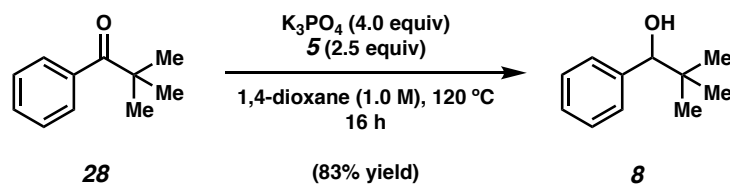

**Alcohol 8.** Purification by flash chromatography (24:1 Hexanes:EtOAc) generated alcohol **8** (14 mg, 83% yield, average of two experiments) as a white crystalline solid. Alcohol **8**:  $R_f$  0.52 (5:1

Hexanes:EtOAc).  $^1\text{H NMR}$  (500 MHz,  $\text{CDCl}_3$ ):  $\delta$  7.35–7.30 (m, 4H), 7.29–7.26 (m, 1H), 4.40 (d,  $J = 2.8$ , 1H), 1.84 (d,  $J = 2.8$ , 1H), 0.93 (s, 9H). Spectral data match those previously reported.<sup>9</sup>

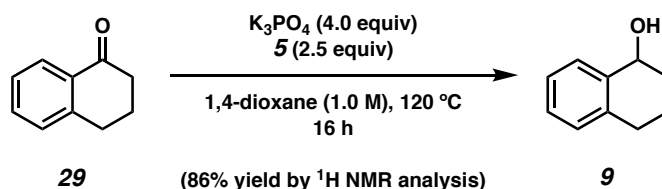

**Alcohol 9.**  $^1\text{H NMR}$  analysis of the crude reaction mixture indicated an 86% yield of alcohol **9** relative to hexamethylbenzene external standard (average of two experiments). Purification by preparative thin-layer chromatography (9:1 PhH:Acetone) provided an analytical sample of alcohol **9** as a clear oil. Alcohol **9**:  $R_f$  0.50 (9:1 PhH:Acetone).  $^1\text{H NMR}$  (500 MHz,  $\text{CDCl}_3$ ):  $\delta$  7.48–7.39 (m, 1H), 7.24–7.17 (m, 2H), 7.14–7.05 (m, 1H), 4.84–4.71 (m, 1H), 2.88–2.78 (m, 1H), 2.87–2.67 (m, 1H), 2.05–1.95 (m, 2H), 1.95–1.87 (m, 1H), 1.85–1.73 (m, 1H), 1.71–1.60 (m, 1H). Spectral data match those previously reported.<sup>10</sup>

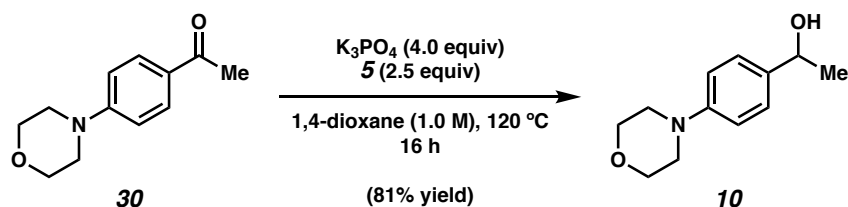

**Alcohol 10.** Purification by flash chromatography (2:2:1  $\text{CH}_2\text{Cl}_2$ : $\text{Et}_2\text{O}$ :Hexanes) generated alcohol **10** (17 mg, 81% yield, average of two experiments) as a pale yellow solid. Alcohol **10**:  $R_f$  0.24 (1:1:1  $\text{CH}_2\text{Cl}_2$ : $\text{Et}_2\text{O}$ :Hexanes).  $^1\text{H NMR}$  (500 MHz,  $\text{CDCl}_3$ ):  $\delta$  7.33–7.28 (m, 2H), 6.93–6.87 (m, 2H), 4.85 (dq,  $J = 6.4, 3.5$ , 1H), 3.90–3.83 (m, 4H), 3.19–3.12 (m, 4H), 1.67 (d,  $J = 3.5$ , 1H), 1.48 (d,  $J = 6.4$ , 3H). Spectral data match those previously reported.<sup>11</sup>

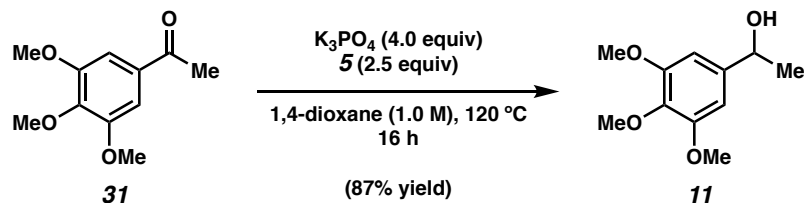

**Alcohol 11.** Purification by flash chromatography (9:1 Hexanes:EtOAc  $\rightarrow$  2:1 Hexanes:EtOAc) generated alcohol **11** (18 mg, 87% yield, average of two experiments) as a clear oil. Alcohol **11**:  $R_f$  0.33 (1:1 Hexanes:EtOAc).  $^1\text{H NMR}$  (500 MHz,  $\text{CDCl}_3$ ):  $\delta$  6.60 (s, 2H), 4.89–4.77 (m, 1H), 3.86 (s, 6H), 3.83 (s, 3H), 1.99–1.80 (m, 1H), 1.48 (d,  $J = 6.4$ , 3H). Spectral data match those previously reported.<sup>11</sup>

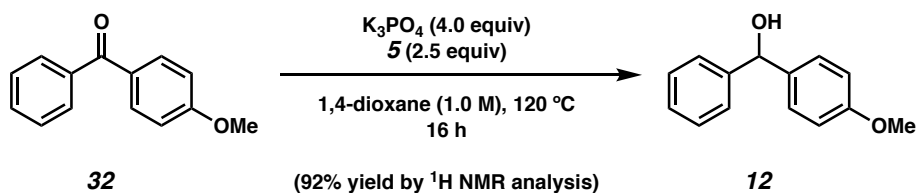

**Alcohol 12.**  $^1\text{H NMR}$  analysis of the crude reaction mixture indicated a 92% yield of alcohol **12** relative to hexamethylbenzene external standard (average of two experiments). Purification by preparative thin-layer chromatography (3:3:2  $\text{CH}_2\text{Cl}_2$ : $\text{Et}_2\text{O}$ :Hexanes) provided an analytical sample of alcohol **12** as a pale yellow solid. Alcohol **12**:  $R_f$  0.70 (1:1:1  $\text{CH}_2\text{Cl}_2$ : $\text{Et}_2\text{O}$ :Hexanes).  $^1\text{H NMR}$  (500 MHz,  $\text{CDCl}_3$ ):  $\delta$  7.40–7.31 (m, 4H), 7.31–7.23 (m, 3H), 6.93–6.81 (m, 2H), 5.82 (d,  $J = 3.0$ , 1H), 3.79 (s, 3H), 2.15 (d,  $J = 3.4$ , 1H). Spectral data match those previously reported.<sup>7</sup>

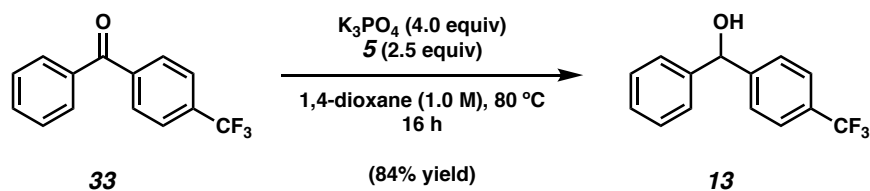

**Alcohol 13.** Purification by flash chromatography (9:1 Hexanes: $\text{Et}_2\text{O}$   $\rightarrow$  3:1 Hexanes: $\text{Et}_2\text{O}$ ) generated alcohol **13** (21 mg, 84% yield, average of two experiments) as a clear oil. Alcohol **13**:  $R_f$  0.30 (5:1 Hexanes: $\text{Et}_2\text{O}$ ).  $^1\text{H NMR}$  (500 MHz,  $\text{CDCl}_3$ ):  $\delta$  7.60 (d,  $J = 8.3$ , 2H), 7.51 (d,  $J =$

8.3, 2H), 7.42–7.34 (m, 4H), 7.34–7.28 (m, 1H), 5.88 (s, 1H), 2.46–2.32 (m, 1H). Spectral data match those previously reported.<sup>7</sup>

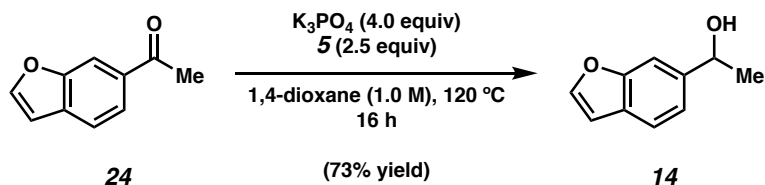

**Alcohol 14.** Purification by flash chromatography (90:9:1 → 15:9:1 Hexanes:PhH:Acetone) generated alcohol **14** (12 mg, 73% yield, average of two experiments) as a yellow oil. Alcohol **14**:  $R_f$  0.39 (9:1 PhH:Acetone);  $^1\text{H NMR}$  (500 MHz,  $\text{C}_6\text{D}_6$ ):  $\delta$  7.50–7.46 (m, 1H), 7.35 (d,  $J = 8.1$  Hz, 1H), 7.12 (ddd,  $J = 8.1, 1.4, 0.5$  Hz, 1H), 6.35 (dd,  $J = 2.2, 1.1$  Hz, 1H), 4.59 (q,  $J = 6.5$  Hz, 1H), 1.29 (d,  $J = 6.5$  Hz, 3H), 1.14, (br s, 1H);  $^{13}\text{C NMR}$  (125 MHz,  $\text{CDCl}_3$ ):  $\delta$  155.3, 145.4, 142.8, 126.9, 121.2, 120.6, 108.4, 106.5, 70.7, 25.6; IR (film): 3350, 2972, 2926, 1430, 1265  $\text{cm}^{-1}$ ; HRMS-APCI ( $m/z$ )  $[\text{M} + \text{H}]^+$  calcd for  $\text{C}_{10}\text{H}_{11}\text{O}_2^+$ , 163.0754; found 163.0746.

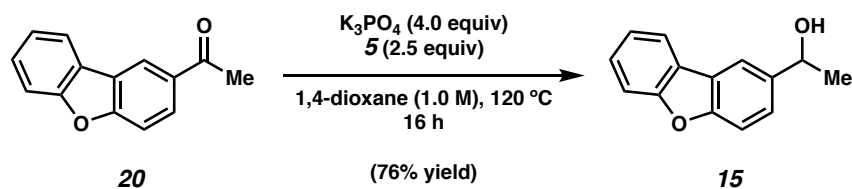

**Alcohol 15.** Purification by flash chromatography (90:9:1 → 25:9:1 Hexanes:PhH:Acetone) generated alcohol **15** (16 mg, 76% yield, average of two experiments) as a yellow solid. Alcohol **15**:  $R_f$  0.35 (9:1 PhH:Acetone).  $^1\text{H NMR}$  (400 MHz,  $\text{CDCl}_3$ ):  $\delta$  8.03–7.91 (m, 2H), 7.60–7.51 (m, 2H), 7.50–7.43 (m, 2H), 7.35 (td,  $J = 7.5, 1.0$ , 1H), 5.09 (dq,  $J = 6.4, 3.3$ , 1H), 1.90 (d,  $J = 3.3$ , 1H), 1.60 (d,  $J = 6.4$ , 3H). Spectral data match those previously reported.<sup>12</sup>



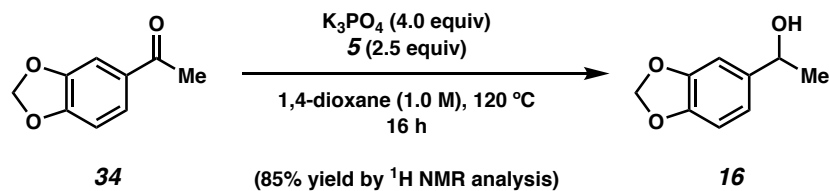

**Alcohol 16.**  $^1\text{H}$  NMR analysis of the crude reaction mixture indicated an 85% yield of alcohol **16** relative to hexamethylbenzene external standard. Purification by preparative thin-layer chromatography (13:1:1 PhH:Et<sub>2</sub>O:CH<sub>3</sub>CN) provided an analytical sample of alcohol **16** as a yellow oil. Alcohol **16**:  $R_f$  0.30 (13:1:1 PhH:Et<sub>2</sub>O:CH<sub>3</sub>CN);  $^1\text{H}$  NMR (500 MHz, CDCl<sub>3</sub>):  $\delta$  6.90 (s, 1H), 6.82 (dd,  $J = 8.1, 1.7$  Hz, 1H), 6.77 (d,  $J = 8.1$  Hz, 1H), 5.95 (s, 2H), 4.86–4.79 (m, 1H), 1.70 (d,  $J = 3.4$  Hz, 1H), 1.46 (d,  $J = 6.4$  Hz, 3H);  $^{13}\text{C}$  NMR (125 MHz, CDCl<sub>3</sub>):  $\delta$  147.9, 147.0, 140.1, 118.8, 108.2, 106.2, 101.1, 70.4, 25.3; IR (film): 3361, 2972, 2890, 1487, 1240 cm<sup>-1</sup>; HRMS-APCI ( $m/z$ ) [ $M + \text{H}$ ]<sup>+</sup> calcd for C<sub>9</sub>H<sub>11</sub>O<sub>3</sub><sup>+</sup>, 167.0703; found 167.0699.

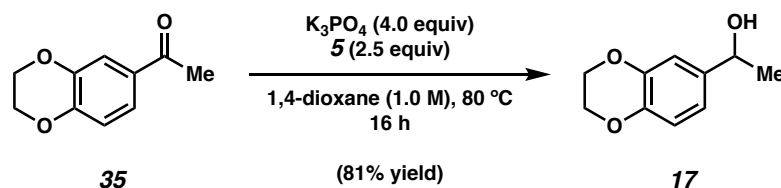

**Alcohol 17.** Purification by flash chromatography (98:1:1  $\rightarrow$  28:1:1 PhH:Et<sub>2</sub>O:CH<sub>3</sub>CN) generated alcohol **17** (15 mg, 81% yield, average of two experiments) as a yellow oil. Alcohol **17**:  $R_f$  0.32 (13:1:1 PhH:Et<sub>2</sub>O:CH<sub>3</sub>CN).  $^1\text{H}$  NMR (500 MHz, CDCl<sub>3</sub>):  $\delta$  6.92–6.88 (m, 1H), 6.86–6.81 (m, 2H), 4.80 (dq,  $J = 6.4, 3.6$ , 1H), 4.25 (s, 4H), 1.69 (d,  $J = 3.6$ , 1H), 1.46 (d,  $J = 6.4$ , 3H). Spectral data match those previously reported.<sup>13</sup>

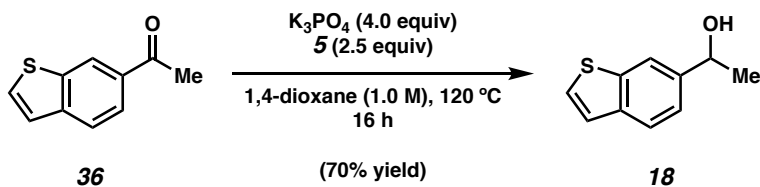

**Alcohol 18.** Purification by flash chromatography (90:9:1  $\rightarrow$  40:9:1 Hexanes:PhH:Acetone) generated alcohol **8** (12 mg, 70% yield, average of two experiments) as a yellow oil. Alcohol **18**:  $R_f$  0.38 (9:1 PhH:Acetone);  $^1\text{H}$  NMR (500 MHz, CDCl<sub>3</sub>):  $\delta$  7.91 (s, 1H), 7.80 (d,  $J = 8.2$  Hz,

1H), 7.43 (d,  $J = 5.5$  Hz, 1H), 7.38 (dd,  $J = 8.3, 1.3$  Hz, 1H), 7.32 (d,  $J = 5.5$  Hz, 1H), 5.10–5.0 (m, 1H), 1.85 (d,  $J = 3.4$  Hz, 1H), 1.56 (d,  $J = 6.5$  Hz, 3H);  $^{13}\text{C}$  NMR (125 MHz,  $\text{CDCl}_3$ ):  $\delta$  142.3, 140.1, 139.2, 126.6, 123.8, 123.7, 122.3, 119.2, 70.7, 25.5; IR (film): 3351, 2971, 1398, 1197, 1074  $\text{cm}^{-1}$ ; HRMS-APCI ( $m/z$ ) [ $\text{M}$ ] $^+$  calcd for  $\text{C}_{10}\text{H}_{10}\text{OS}^+$ , 178.0447; found 178.0437.

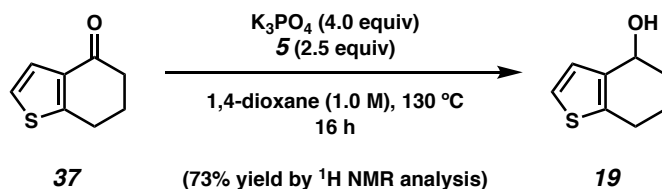

**Alcohol 19.**  $^1\text{H}$  NMR analysis of the crude reaction mixture indicated a 73% yield of alcohol **19** relative to hexamethylbenzene external standard. Purification by preparative thin-layer chromatography (1:1:1 Hexanes: $\text{Et}_2\text{O}$ : $\text{CH}_2\text{Cl}_2$ ) provided an analytical sample of alcohol **19** as a white crystalline solid. Alcohol **19**:  $R_f$  0.48 (1:1:1 Hexanes: $\text{Et}_2\text{O}$ : $\text{CH}_2\text{Cl}_2$ );  $^1\text{H}$  NMR (500 MHz,  $\text{CDCl}_3$ ):  $\delta$  7.10 (dt,  $J = 5.2, 0.7$  Hz, 1H), 7.03 (d,  $J = 5.2$  Hz, 1H), 4.82–4.75 (m, 1H), 2.89–2.79 (m, 1H), 2.77–2.67 (m, 1H), 2.06–1.94 (m, 2H), 1.93–1.79 (m, 2H), 1.64 (d,  $J = 7.0$  Hz, 1H);  $^{13}\text{C}$  NMR (125 MHz,  $\text{CDCl}_3$ ):  $\delta$  139.0, 138.1, 126.7, 122.9, 65.6, 32.5, 25.2, 20.1; IR (film): 3235, 2936, 2921, 1431, 982  $\text{cm}^{-1}$ ; HRMS-APCI ( $m/z$ ) [ $\text{M} + \text{H}$ ] $^+$  calcd for  $\text{C}_8\text{H}_{11}\text{OS}^+$ , 155.0525; found 155.0521.

### G. Gram-Scale Base-Mediated MPV Reduction

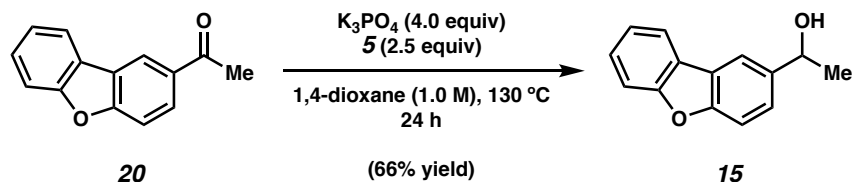

**Alcohol 15.** An 8-dram vial was charged with anhydrous powdered  $\text{K}_3\text{PO}_4$  (4.04 g, 19.0 mmol, 4.00 equiv) and a magnetic stir bar. The vial and its contents were flame-dried under reduced pressure, then allowed to cool under  $\text{N}_2$ . Ketone substrate **20** (1.00 g, 4.76 mmol, 1.00 equiv) and alcohol reductant **5** (1.96 g, 11.9 mmol, 2.50 equiv) were then added. The vial was flushed with  $\text{N}_2$  and subsequently 1,4-dioxane (4.76 mL, 1.00 M) was added. Under a stream of  $\text{N}_2$ , the vial septum cap was quickly switched for a Teflon-lined screw cap, sealed, then further sealed with electrical tape. The reaction was then stirred vigorously (800 rpm) at 130 °C for 24 h. After cooling to 23 °C, the reaction was quenched by the addition of sat. aq.  $\text{NH}_4\text{Cl}$  (8.00 mL) and diluted with EtOAc (6.00 mL) and the layers were separated. The aqueous layer was extracted with EtOAc (3 x 6.00 mL) and the combined organic layers were passed through a plug (1.00 cm OD) of silica gel (3.00 cm tall) and  $\text{Na}_2\text{SO}_4$  (3.00 cm tall) using EtOAc (10.0 mL) as eluent. The volatiles were removed under reduced pressure. The crude residue was purified by flash chromatography (60:9:1 Hexanes:PhH:Acetone  $\rightarrow$  5:9:1 Hexanes:PhH:Acetone) to yield alcohol **15** (664 mg, 66% yield) as a yellow solid. Alcohol **15**:  $R_f$  0.32 (5:1 Hexanes:EtOAc). Spectral data match those previously reported.<sup>12</sup>

## H. Stereospecific Base-Mediated MPV Reduction

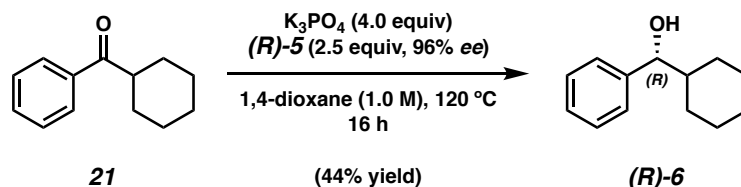

**Alcohol (R)-6.** A 1-dram vial was charged with anhydrous powdered  $\text{K}_3\text{PO}_4$  (85.0 mg, 0.400 mmol, 4.00 equiv) and a magnetic stir bar. The vial and its contents were flame-dried under reduced pressure, then allowed to cool under  $\text{N}_2$ . Ketone substrate **21** (18.8 mg, 0.100 mmol, 1.00 equiv) and alcohol reductant **(R)-5** (41.3 mg, 0.250 mmol, 2.50 equiv) were added. The vial was purged with  $\text{N}_2$  and subsequently, 1,4-dioxane (0.100 mL, 1.00 M) was added. Under a stream of  $\text{N}_2$ , the vial septum cap was quickly switched for a Teflon-lined screw cap, sealed, then further sealed with electrical tape. The reaction was stirred vigorously (800 rpm) at 120 °C for 16 h. After cooling to 23 °C, the reaction was quenched by the addition of sat. aq.  $\text{NH}_4\text{Cl}$  (1.00 mL) and diluted with EtOAc (2.00 mL) and the layers were separated. The aqueous layer was extracted with EtOAc (3 x 2.00 mL) and the combined organic layers were passed through a plug (1.00 cm OD) of silica gel (3.00 cm tall) and  $\text{Na}_2\text{SO}_4$  (3.00 cm tall) using EtOAc (10.0 mL) as eluent. The volatiles were removed under reduced pressure. The crude residue was purified by flash chromatography (99:1 Hexanes:EtOAc  $\rightarrow$  19:1 Hexanes:EtOAc) to yield alcohol **(R)-6** (8.4 mg, 44% yield, 48% ee) as a white crystalline solid. Alcohol **(R)-6**:  $R_f$  0.39 (5:1 Hexanes:EtOAc).  $[\alpha]_D^{21.1} = +20.8$  ( $c = 0.50$ ,  $\text{CHCl}_3$ ). The spectral data match those previously reported in the literature for *rac*-**6**.<sup>7</sup> The major enantiomer product was assigned by comparison to published  $[\alpha]_D$  values for **(R)-6**.<sup>14</sup>

## G. Verification of Enantiopurity

## Chiral SFC &amp; HPLC Assays

| Compound                                                                                          | SFC Method<br>Column/Temp.<br>Abs. Wavelength                             | Solvent                                 | Method<br>Flow Rate | Retention<br>Times<br>(min) | Enantiomeric<br>Ratio<br>(er) |
|---------------------------------------------------------------------------------------------------|---------------------------------------------------------------------------|-----------------------------------------|---------------------|-----------------------------|-------------------------------|
| 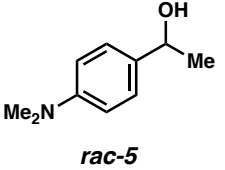<br><i>rac-5</i> | Daicel ChiralPak<br>IC-3/35 °C<br>$\lambda_{\text{abs}} = 210 \text{ nm}$ | 5%<br>isopropanol in<br>CO <sub>2</sub> | 3.5 mL/min          | 7.88/8.61                   | 50:50                         |
| <br><i>(R)-5</i> | Daicel ChiralPak<br>IC-3/35 °C<br>$\lambda_{\text{abs}} = 210 \text{ nm}$ | 5%<br>isopropanol in<br>CO <sub>2</sub> | 3.5 mL/min          | 7.58/8.22                   | 98:2                          |

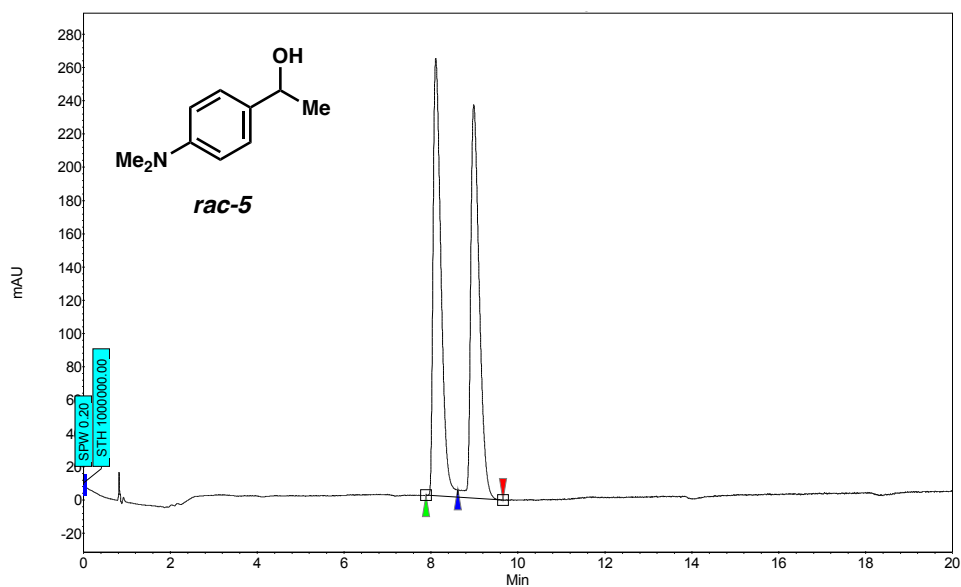

| Index | Name    | Start | Time  | End   | RT Offset | Quantity | Height            | Area                               | Area    |
|-------|---------|-------|-------|-------|-----------|----------|-------------------|------------------------------------|---------|
|       |         | [Min] | [Min] | [Min] | [Min]     | [% Area] | [ $\mu\text{V}$ ] | [ $\mu\text{V} \cdot \text{Min}$ ] | [%]     |
| 1     | UNKNOWN | 7.88  | 8.11  | 8.61  | 0.00      | 50.43    | 263.1             | 55.4                               | 50.434  |
| 2     | UNKNOWN | 8.61  | 8.99  | 9.66  | 0.00      | 49.57    | 236.6             | 54.5                               | 49.566  |
| Total |         |       |       |       |           | 100.00   | 499.7             | 109.9                              | 100.000 |

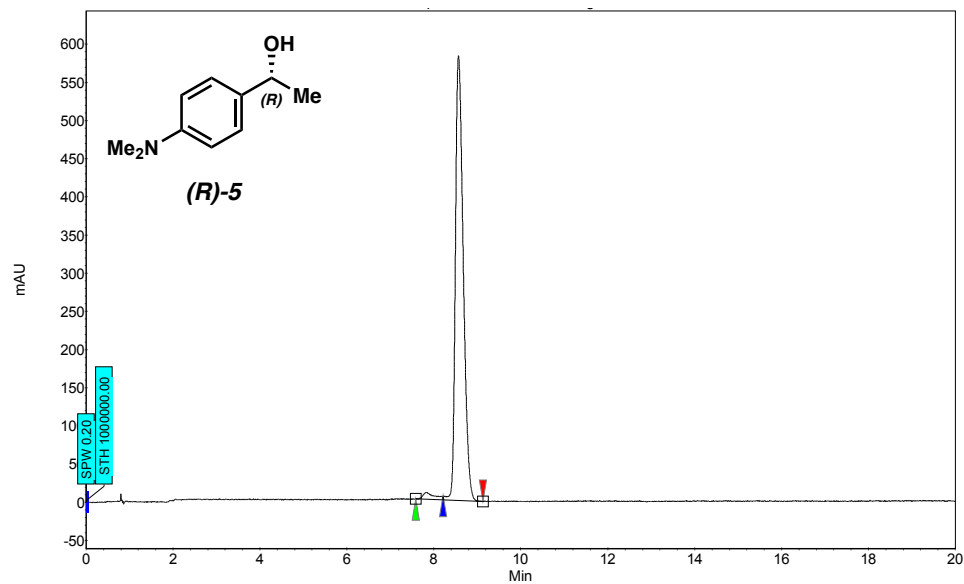

| Index | Name    | Start [Min] | Time [Min] | End [Min] | RT Offset [Min] | Quantity [% Area] | Height [ $\mu$ V] | Area [ $\mu$ V.Min] | Area [%] |
|-------|---------|-------------|------------|-----------|-----------------|-------------------|-------------------|---------------------|----------|
| 1     | UNKNOWN | 7.58        | 7.82       | 8.22      | 0.00            | 2.18              | 8.7               | 2.7                 | 2.176    |
| 2     | UNKNOWN | 8.22        | 8.57       | 9.13      | 0.00            | 97.82             | 582.5             | 122.1               | 97.824   |
| Total |         |             |            |           |                 | 100.00            | 591.1             | 124.8               | 100.000  |

| Compound                                                                                            | HPLC Method<br>Column/Temp.<br>Abs. Wavelength                            | Solvent                          | Method<br>Flow Rate | Retention<br>Times<br>(min) | Enantiomeric<br>Ratio<br>(er) |
|-----------------------------------------------------------------------------------------------------|---------------------------------------------------------------------------|----------------------------------|---------------------|-----------------------------|-------------------------------|
| 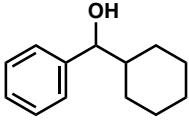<br><b>rac-6</b> | Daicel ChiralPak<br>OD-H/23 °C<br>$\lambda_{\text{abs}} = 210 \text{ nm}$ | 10%<br>isopropanol in<br>Hexanes | 1 mL/min            | 5.14/5.77                   | 50:50                         |
| <br><b>(R)-6</b> | Daicel ChiralPak<br>OD-H/23 °C<br>$\lambda_{\text{abs}} = 210 \text{ nm}$ | 10%<br>isopropanol in<br>Hexanes | 1 mL/min            | 5.16/5.70                   | 74:26                         |

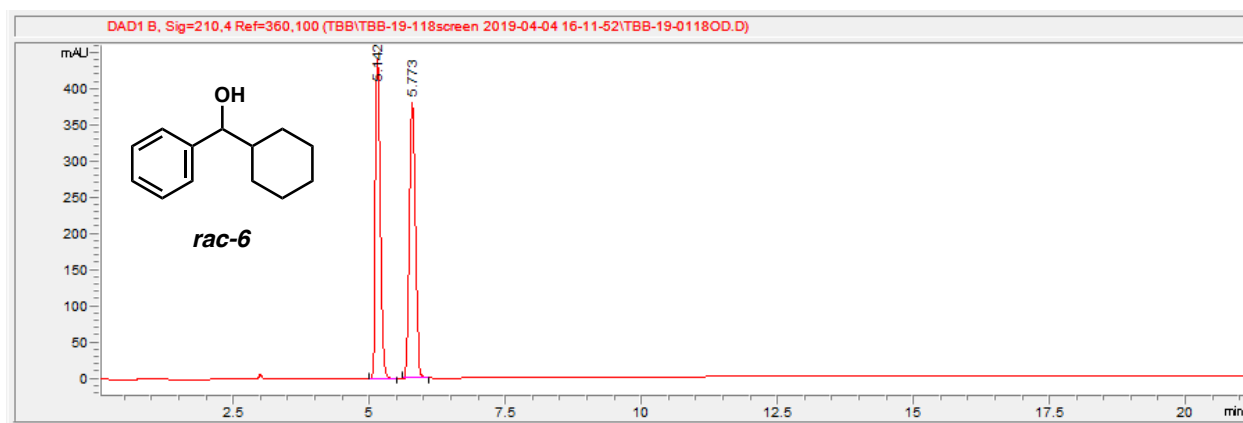

| # | Time  | Area   | Height | Width  | Area%  | Symmetry |
|---|-------|--------|--------|--------|--------|----------|
| 1 | 5.142 | 2774.2 | 442.1  | 0.0972 | 50.021 | 0.833    |
| 2 | 5.773 | 2771.9 | 380.2  | 0.113  | 49.979 | 0.836    |

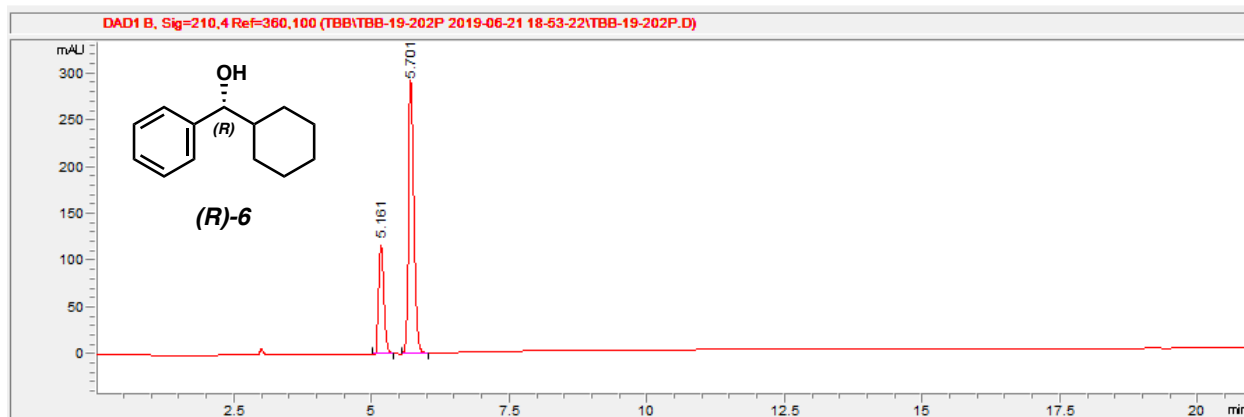

| # | Time  | Area   | Height | Width  | Area%  | Symmetry |
|---|-------|--------|--------|--------|--------|----------|
| 1 | 5.161 | 732.7  | 116.3  | 0.0975 | 25.919 | 0.834    |
| 2 | 5.701 | 2094.1 | 291.8  | 0.1107 | 74.081 | 0.837    |

## References

- <sup>1</sup> Mori, A.; Miyakawa, Y.; Ohashi, E.; Haga, T.; Maegawa, T.; Sajiki, H. Pd/C-catalyzed chemoselective hydrogenation in the presence of diphenylsulfide. *Org. Lett.* **2006**, *8*, 3279–3281.
- <sup>2</sup> Ramgren, S. D.; Garg, N. K. Pd-catalyzed acetylation of arenes. *Org. Lett.* **2014**, *16*, 824–827.
- <sup>3</sup> Xiao, B.; Gong, T.-J.; Liu, Z.-J.; Liu, J.-H.; Luo, D.-F.; Xu, J.; Liu, L. Synthesis of dibenzofurans via palladium-catalyzed phenol-directed C–H activation/C–O cyclization. *J. Am. Chem. Soc.* **2011**, *133*, 9250–9253.
- <sup>4</sup> Guyon, C.; Baron, M.; Lemaire, M.; Popowycz, F.; Métay, E. Commutative reduction of aromatic ketones to arylmethylenes/alcohols by hypophosphites catalyzed by Pd/C under biphasic conditions. *Tetrahedron* **2014**, *70*, 2088–2095.
- <sup>5</sup> Xu, J.; Wei, T.; Zhang, Q. Influences of electronic effects and anions on the enantioselectivity in the oxazaborolidine-catalyzed asymmetric borane reduction of ketones. *J. Org. Chem.* **2004**, *69*, 6860–6886.
- <sup>6</sup> Genç, S.; Arslan, B.; Gülcemal, S.; Günnaz, S.; Çetinkaya, B.; Gülcemal, D. Iridium(I)-catalyzed C–C and C–N bond formation reactions via the borrowing hydrogen strategy. *J. Org. Chem.* **2019**, *84*, 6286–6297.
- <sup>7</sup> Gaykar, R. N.; Bhunia, A.; Biju, A. T. Employing arynes for the generation of aryl anion equivalents and subsequent reaction with aldehydes. *J. Org. Chem.* **2018**, *83*, 11333–11340.
- <sup>8</sup> Zeng, H.; Wu, J.; Li, S.; Hui, C.; Ta, A.; Cheng, S.-Y.; Zheng, S.; Shang, G. Copper(II)-catalyzed selective hydroboration of ketones and aldehydes. *Org. Lett.* **2019**, *21*, 401–406.
- <sup>9</sup> Rahaim Jr., R. J.; Maleczka Jr., R. E. C–O Hydrogenolysis catalyzed by Pd-PMHS nanoparticles in the company of chloroarenes. *Org. Lett.* **2011**, *13*, 584–587.
- <sup>10</sup> Puls, F.; Knölker, H.-J. Conversion of olefins into ketones by an iron-catalyzed Wacker-type oxidation using oxygen as the sole oxidant. *Angew. Chem., Int. Ed.* **2018**, *57*, 1222–1226.
- <sup>11</sup> Wang, S.; Huang, H.; Tsareva, S.; Bruneau, C.; Fischmeister, C. Silver-catalyzed hydrogenation of ketones under mild conditions. *Adv. Synth. Catal.* **2019**, *361*, 786–790.
- <sup>12</sup> Patpi, S. R.; Pulipati, L.; Yogeewari, P.; Sriram, D.; Jain, N.; Sridhari, B.; Murthy, R.; Devi T., A.; Kalivendi, S. V.; Kantevar, S. Design, synthesis, and structure–activity correlations of novel dibenzo[b,d]furan, dibenzo[b,d]thiophene, and N-methylcarbazole clubbed 1,2,3-triazoles as potent inhibitors of Mycobacterium tuberculosis. *J. Med. Chem.* **2012**, *55*, 3911–3922.



- <sup>13</sup> Moine, E.; Dimier-Poisson, I.; Enguihard-Gueiffier, C.; Logé, C.; Pénichon, M.; Moiré, N.; Delebouzé, C.; Foll-Josselin, B.; Ruchaud, S.; Bach, S.; Gueiffier, A.; Debierre-Grockiego, F.; Denevault-Sabourin, C. Development of new highly potent imidazo[1,2-b]pyridazines targeting *Toxoplasma gondii* calcium-dependent protein kinase 1. *Eur. J. Med. Chem.* **2015**, *105*, 80–105.
- <sup>14</sup> Stepanenko, V.; De Jesús, M.; Correa, W.; Guzmán, I.; Vázquez, C.; de la Cruz, W.; Ortiz-Marciales, M.; Barnes, C. L. Enantioselective reduction of prochiral ketones using spiroborate esters as catalysts. *Tetrahedron Lett.* **2007**, *48*, 5799–5802.

# <sup>1</sup>H NMR Spectra

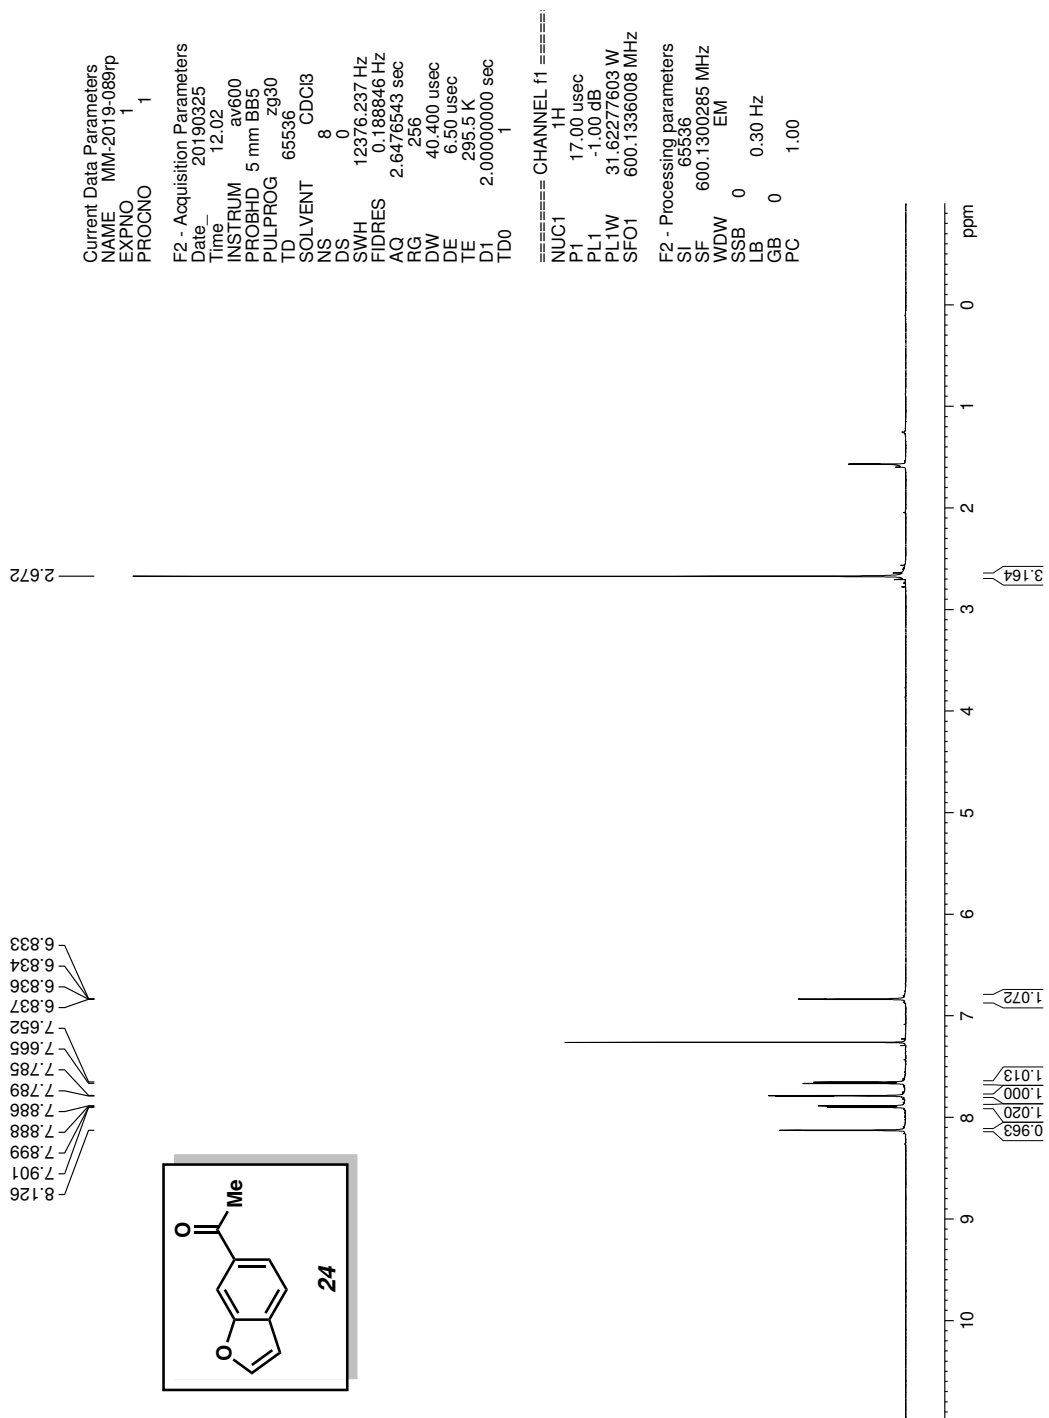

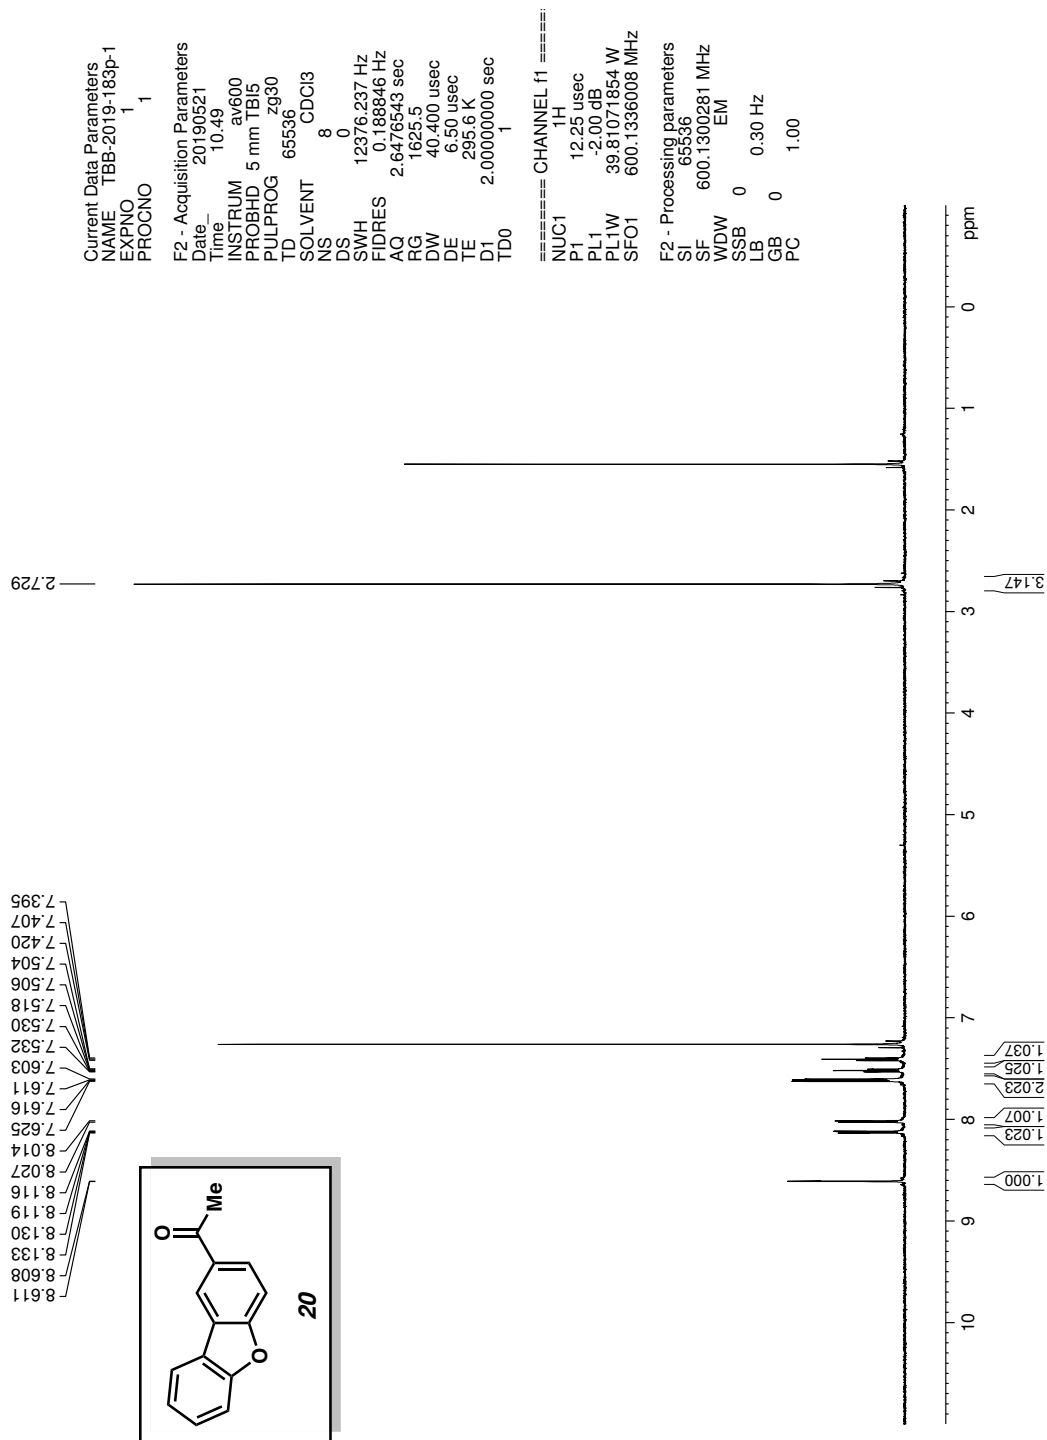

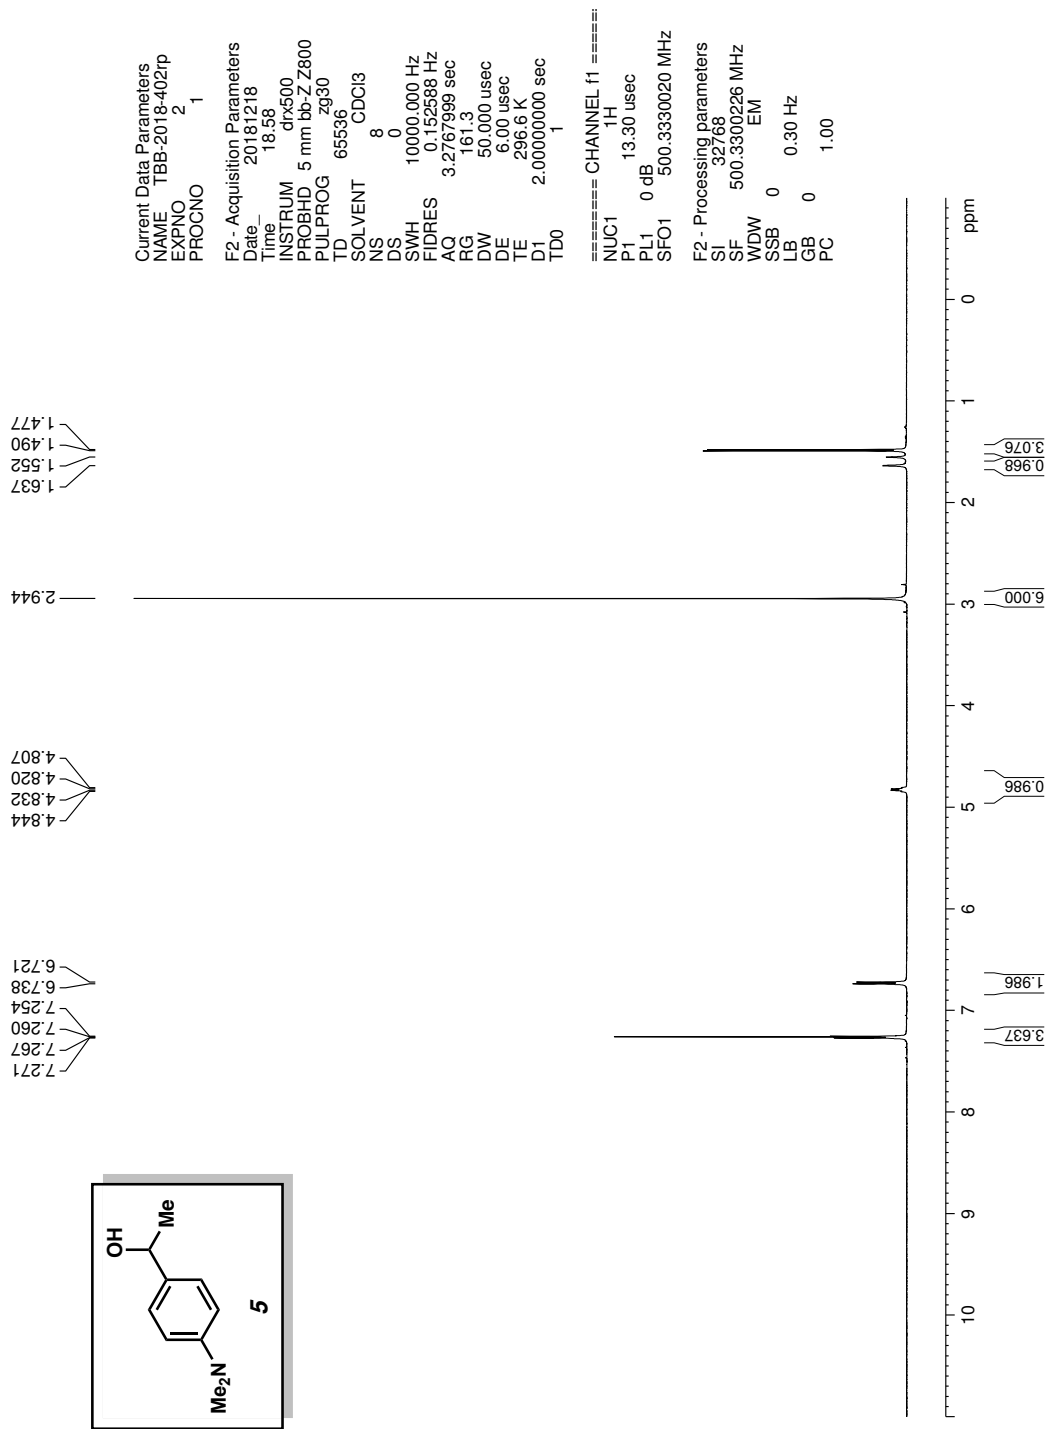

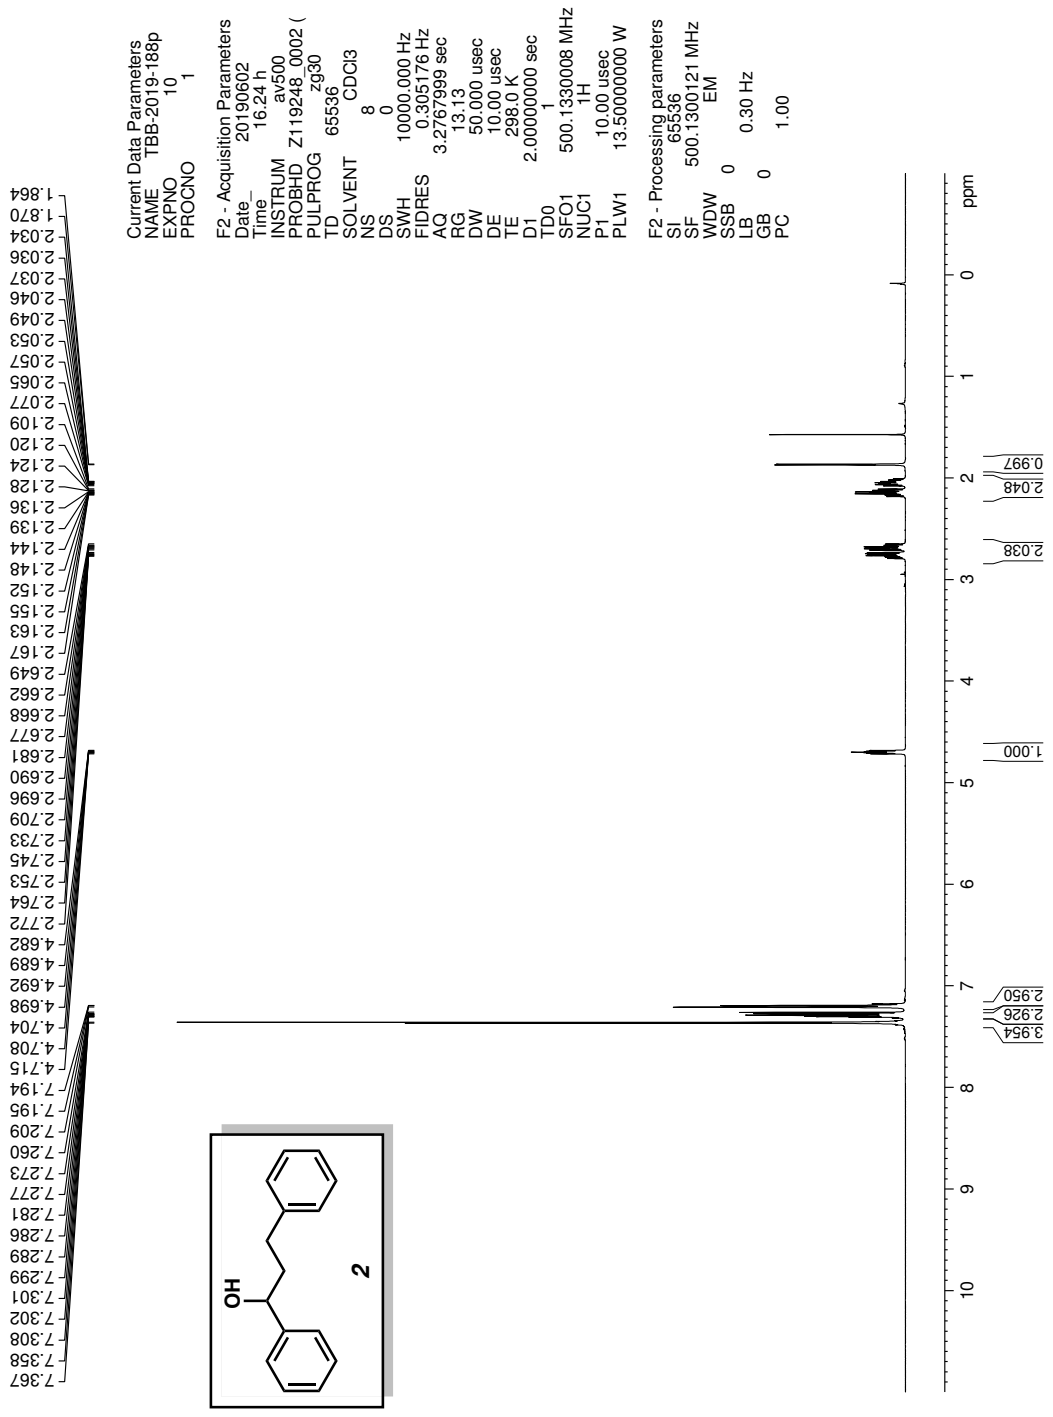

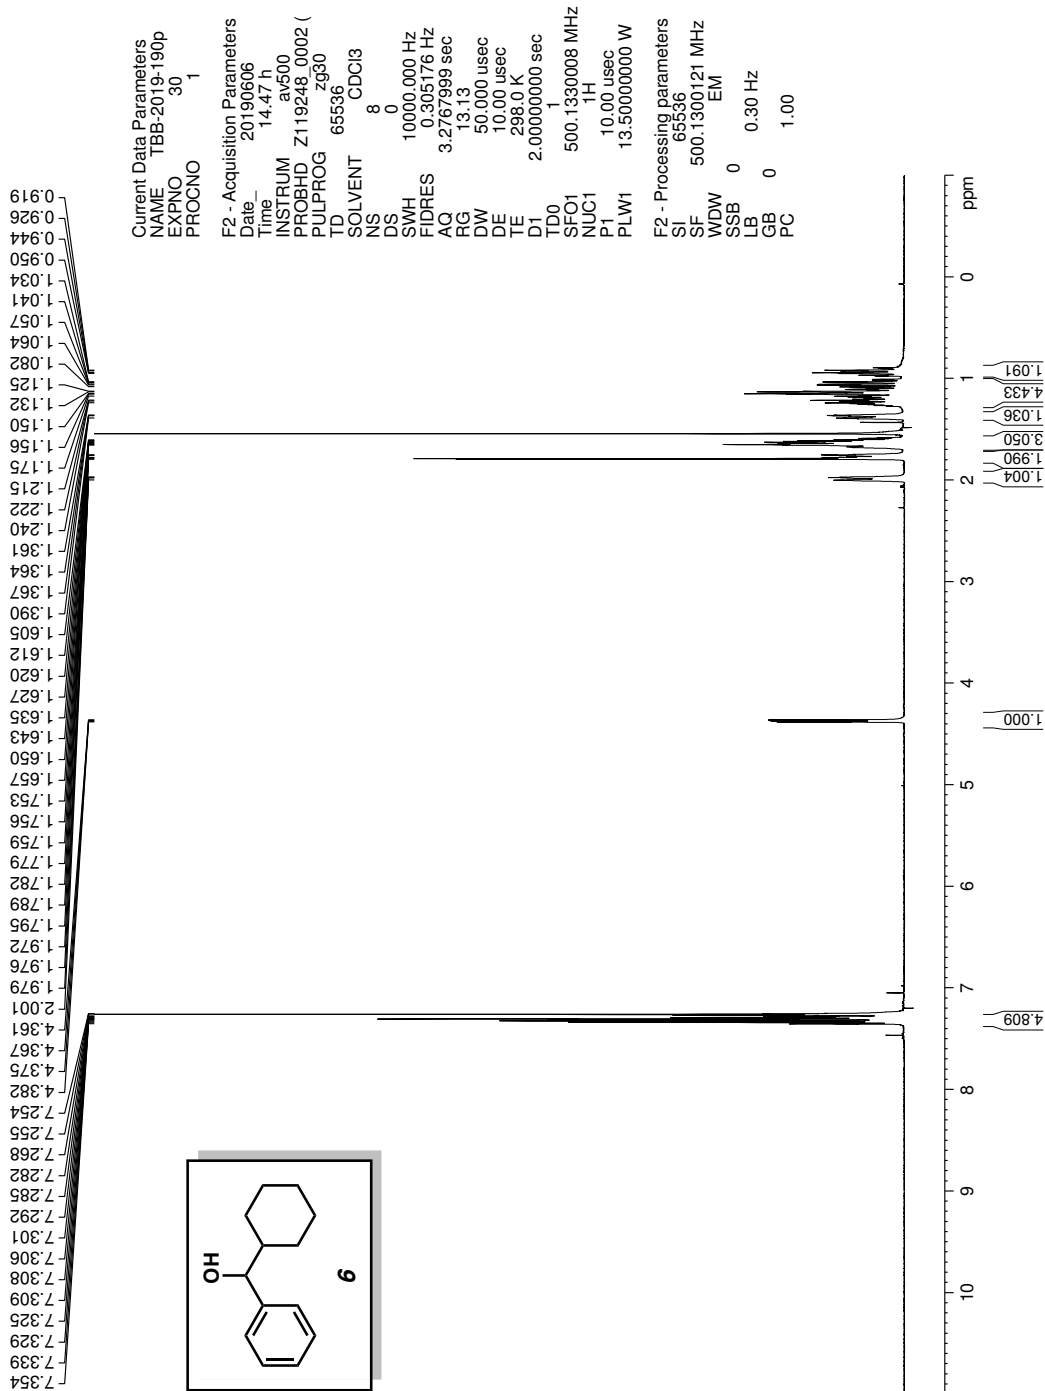

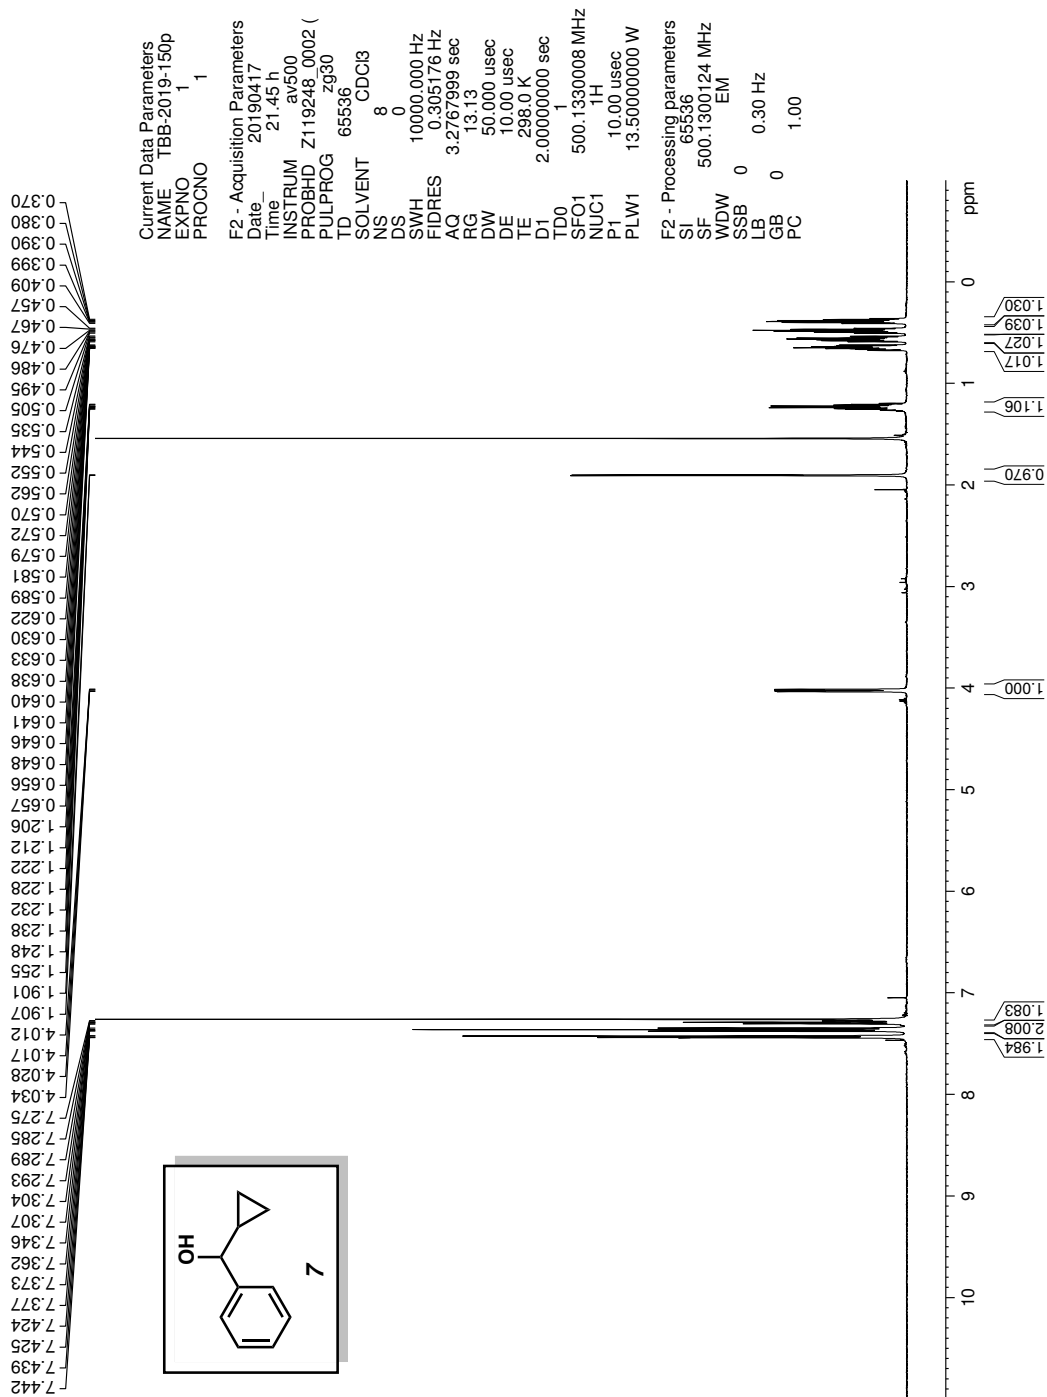



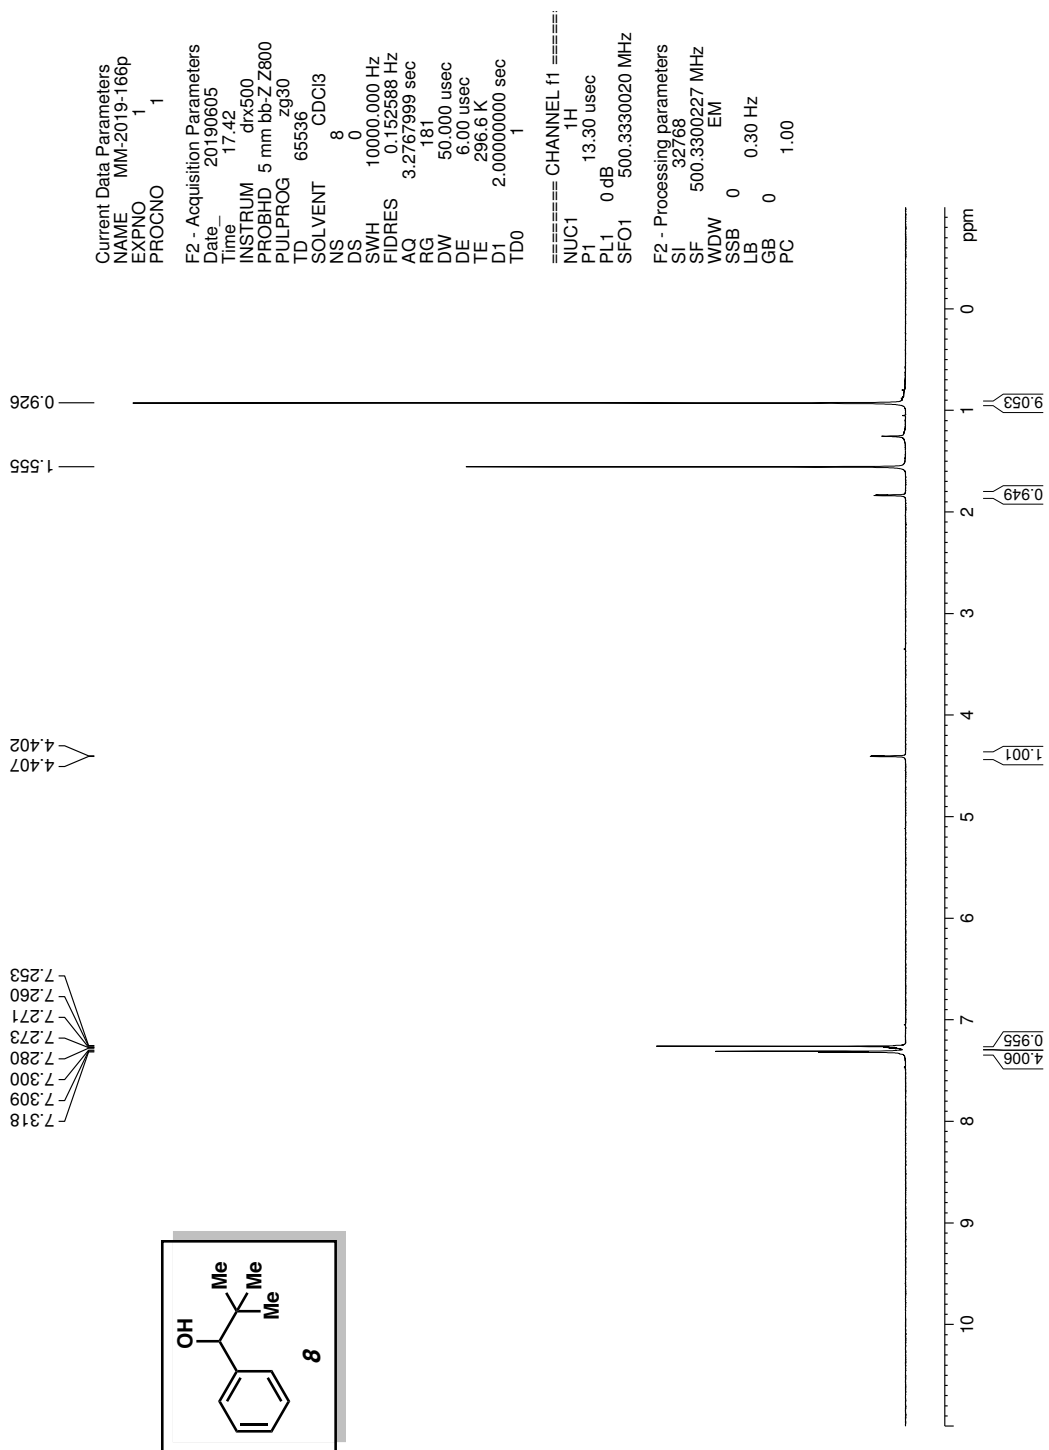

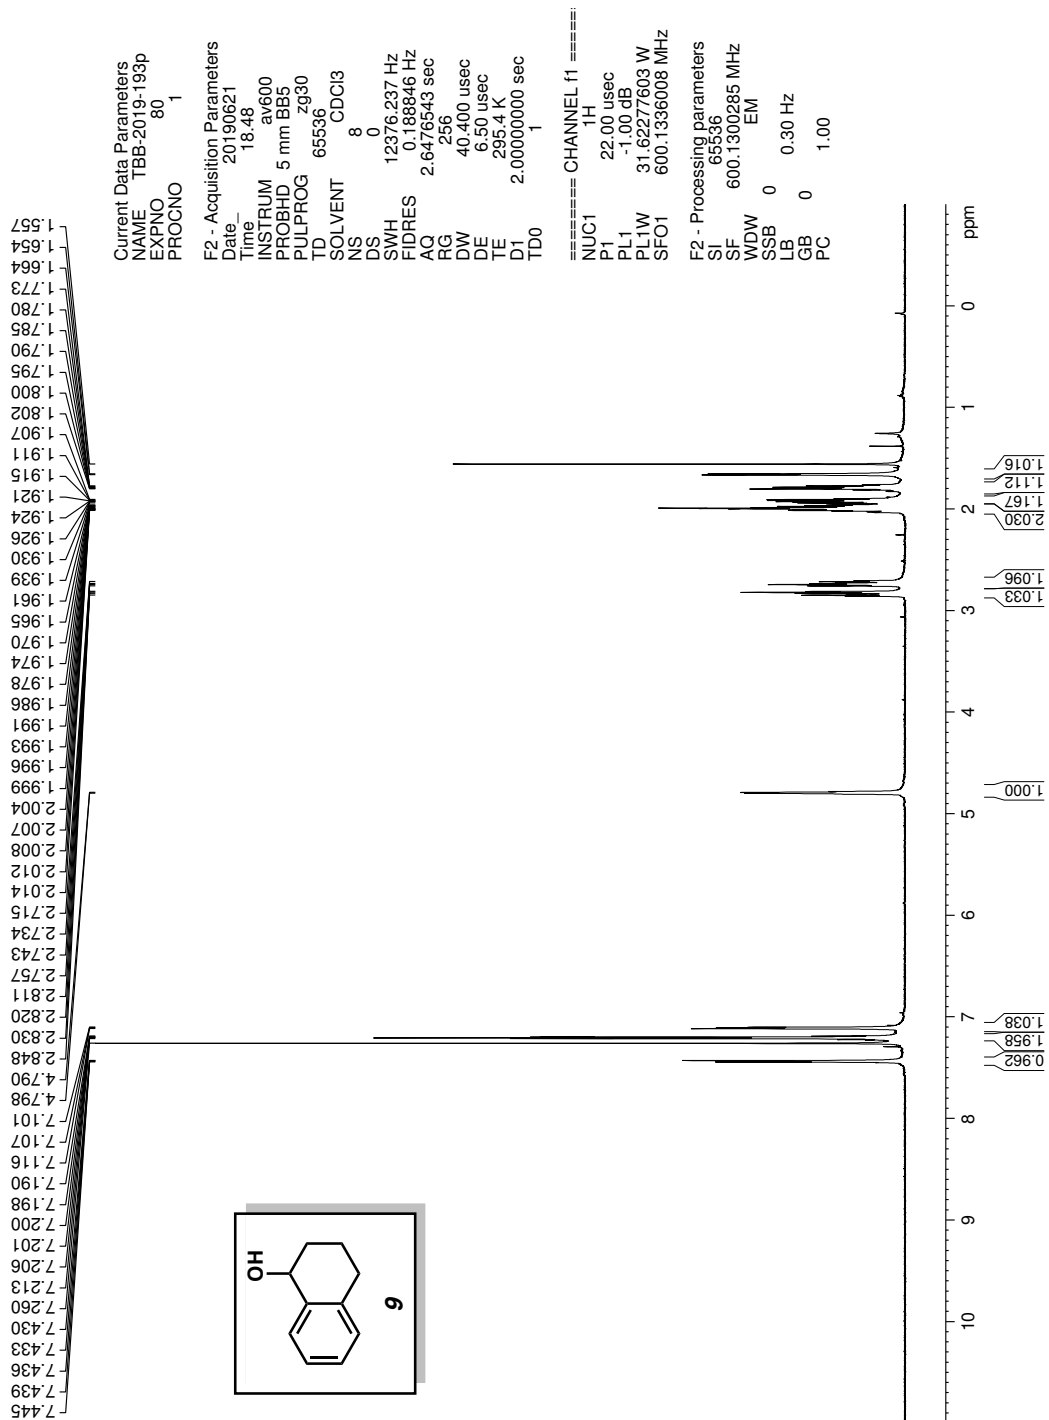

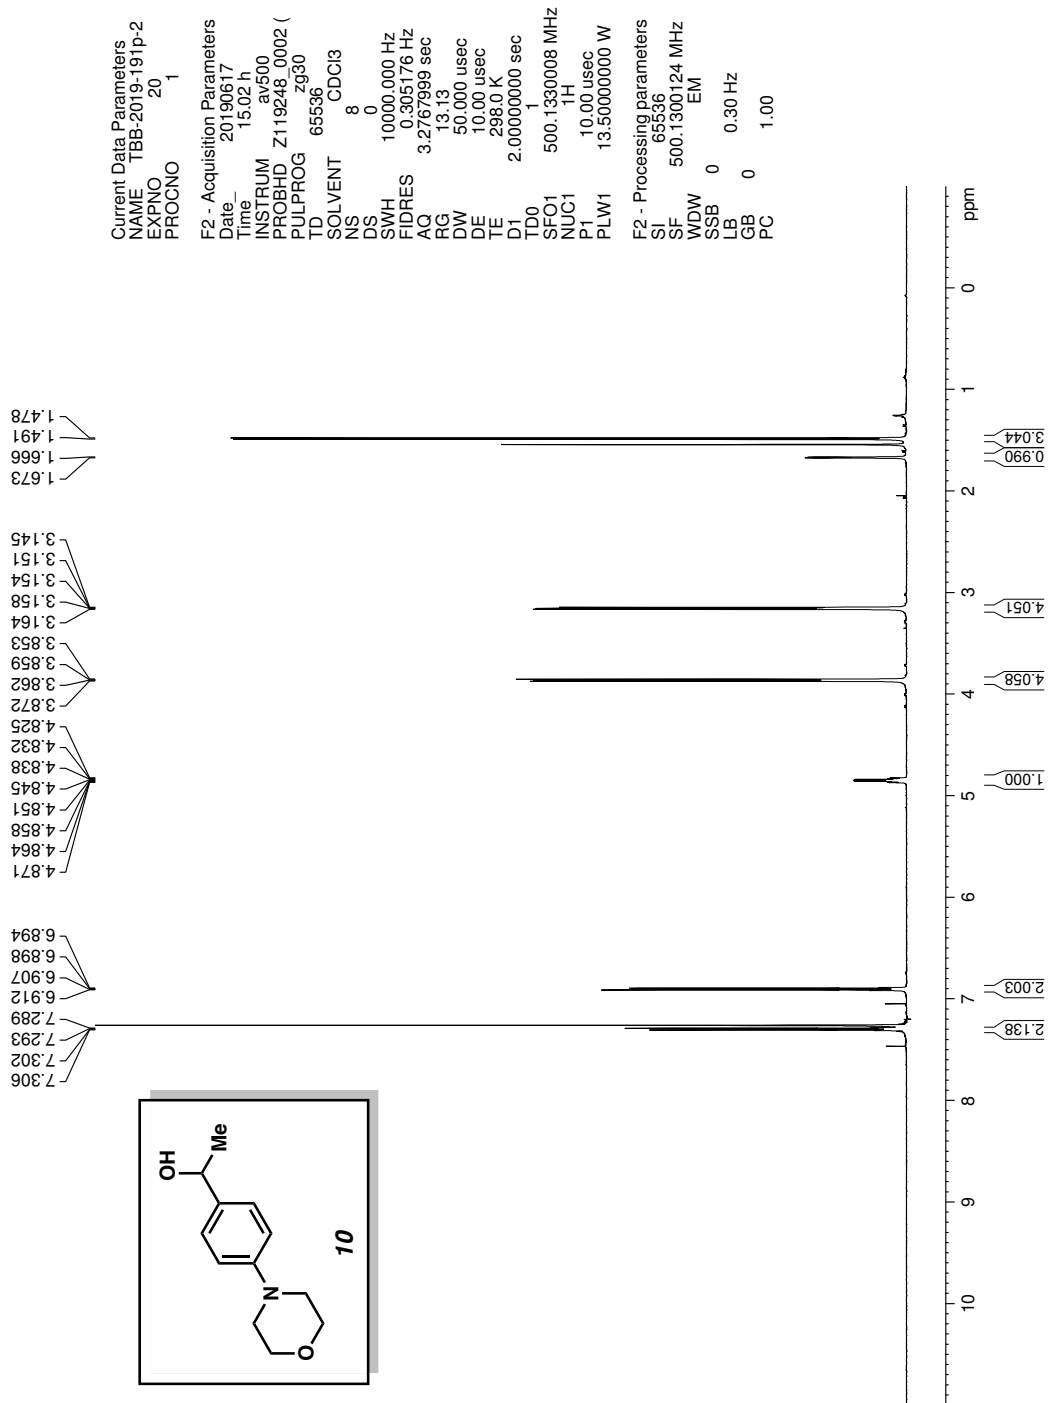

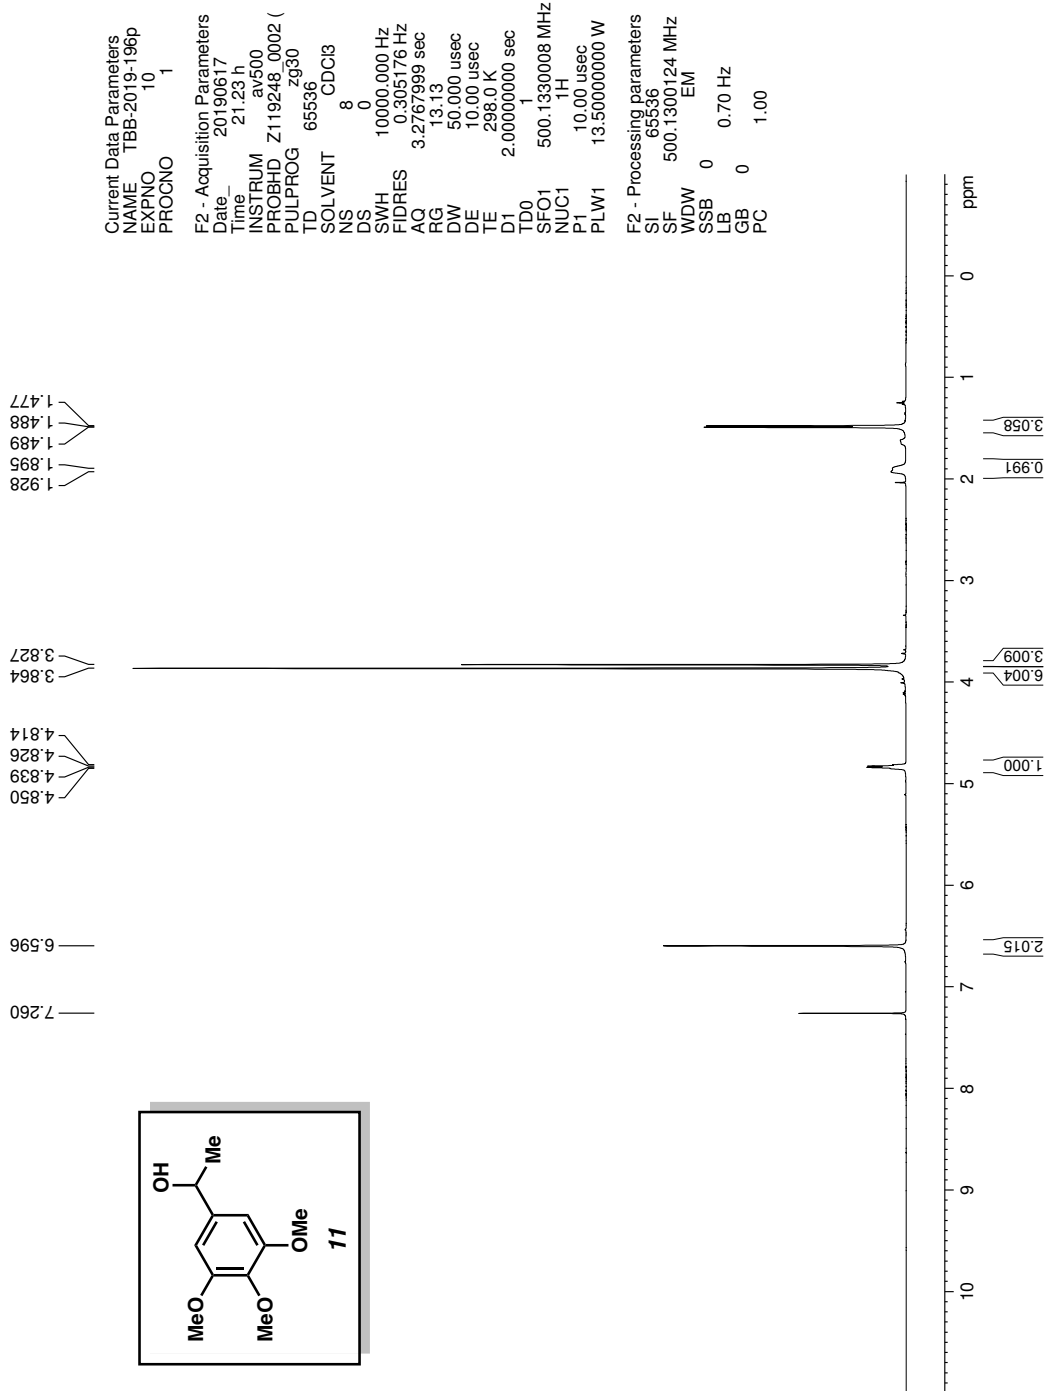

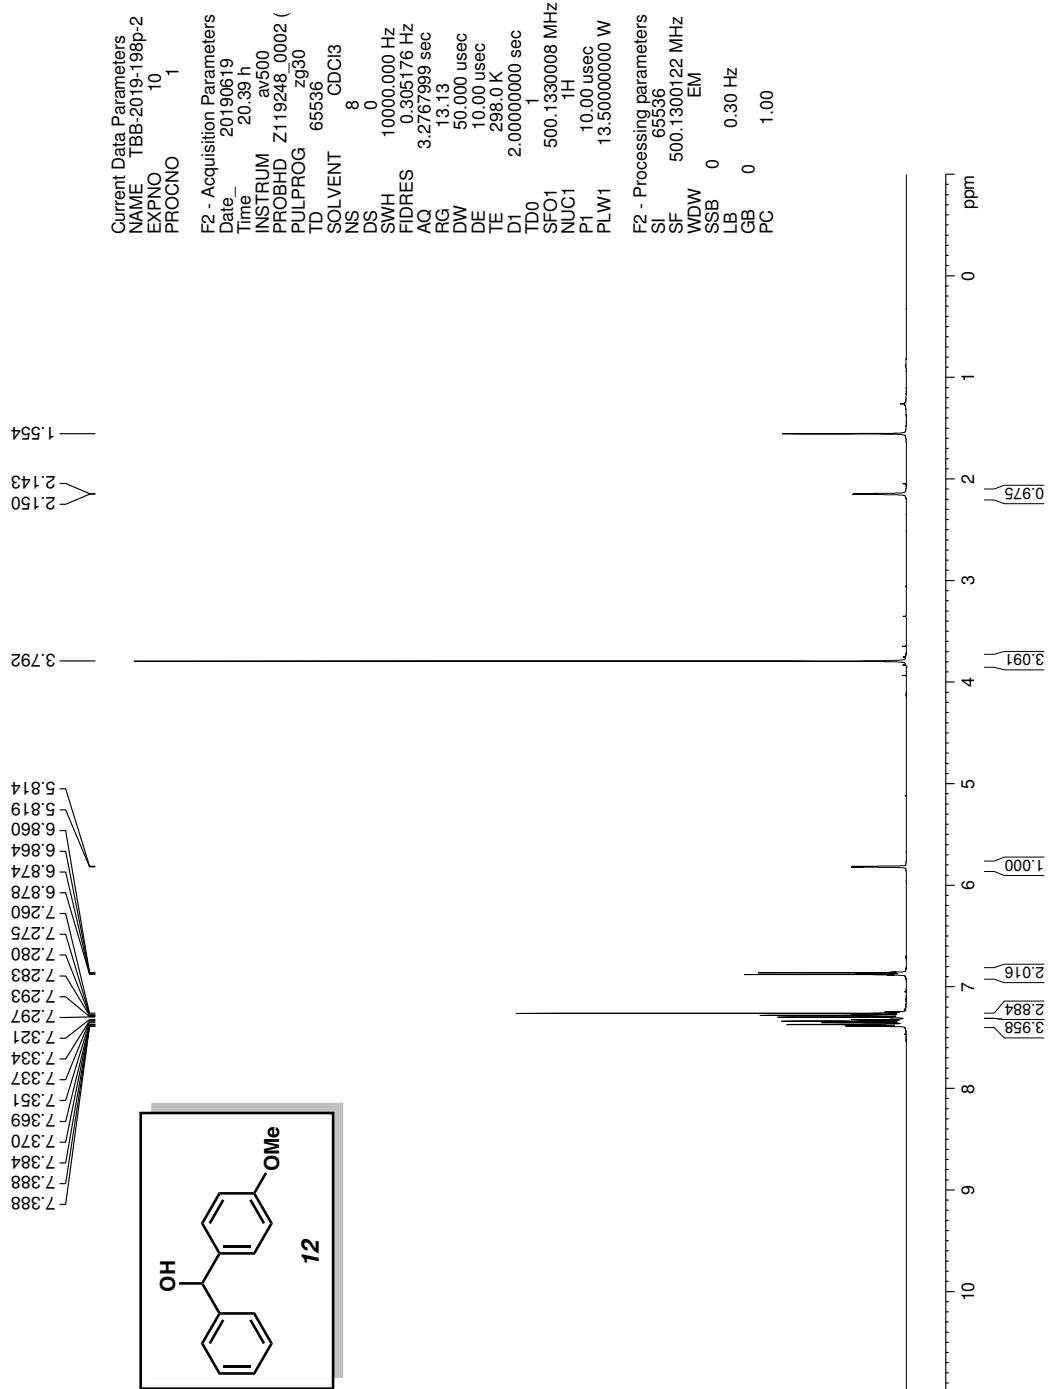



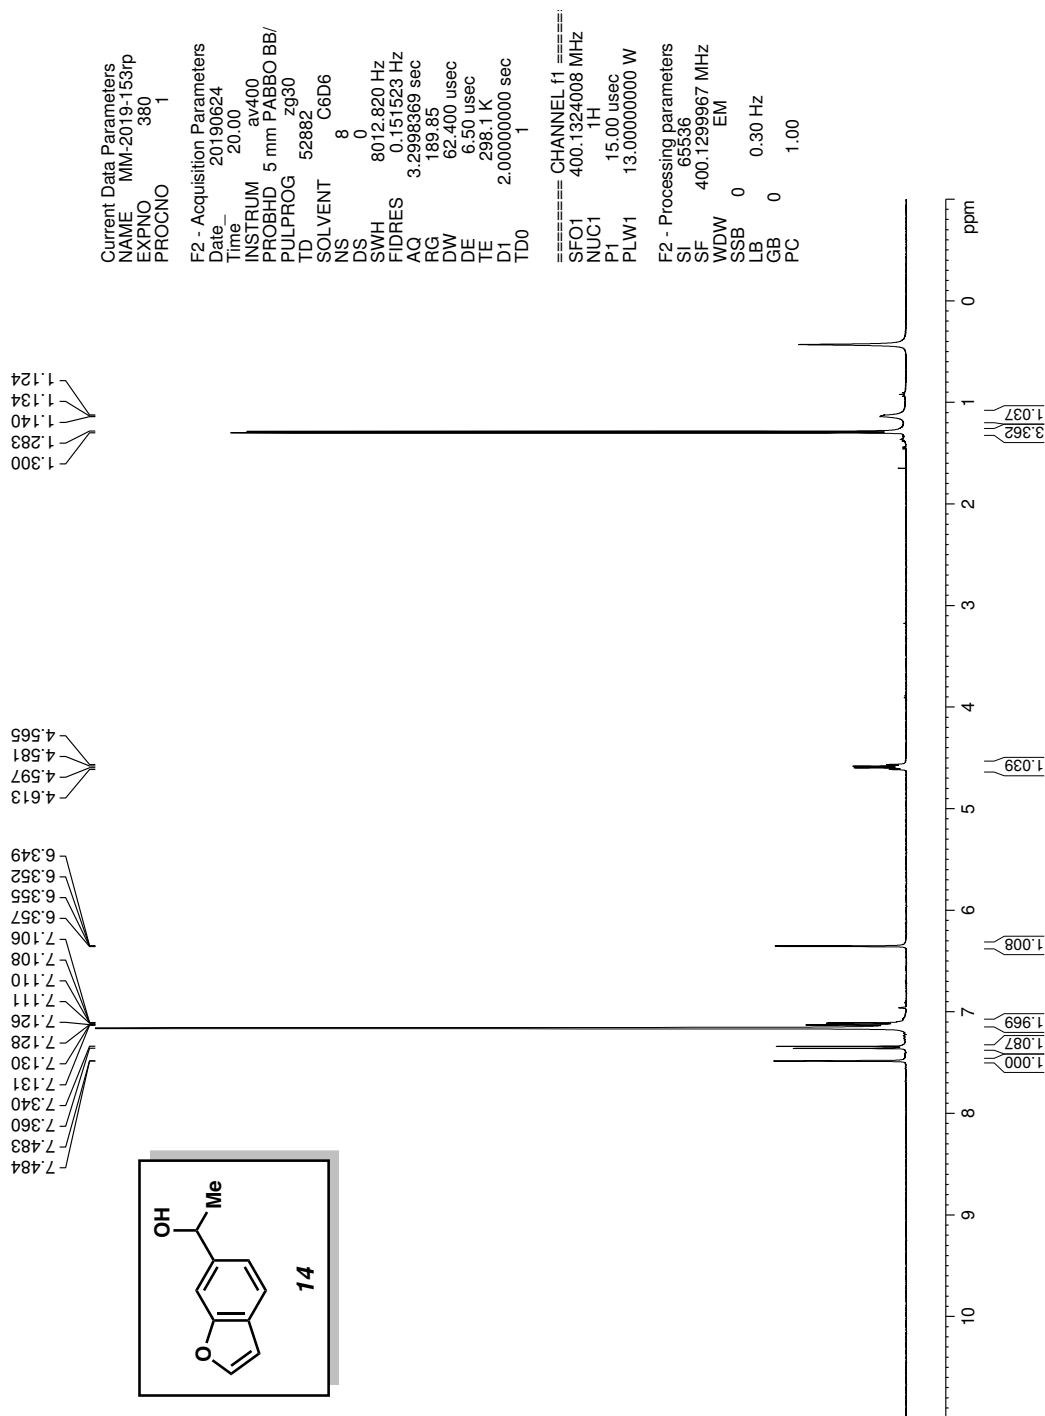

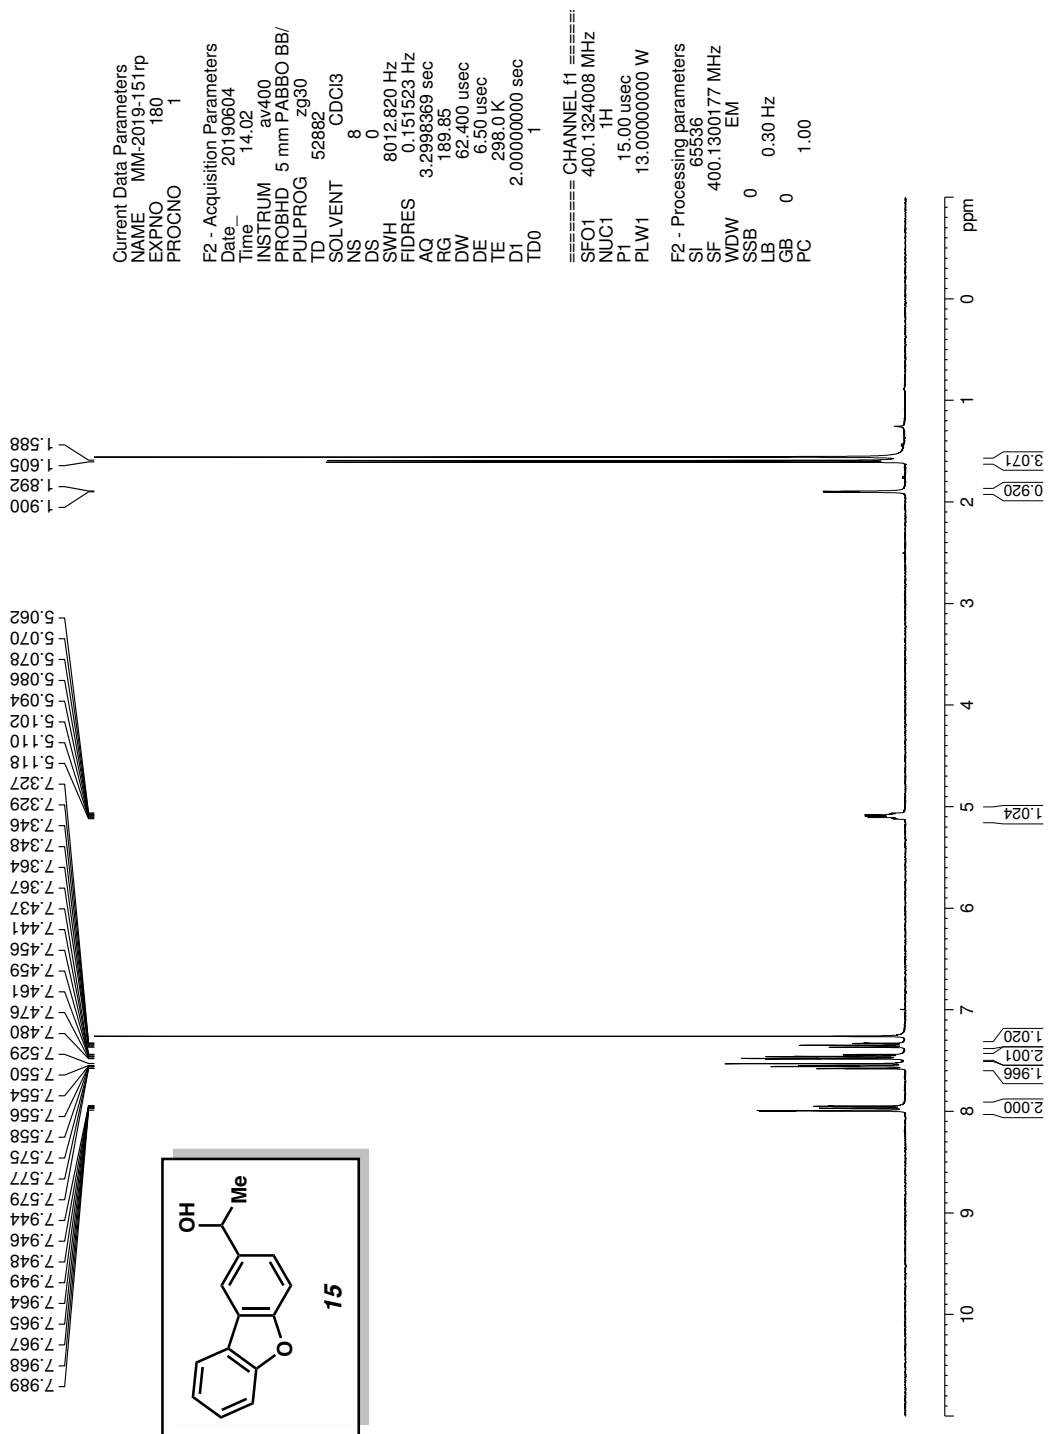



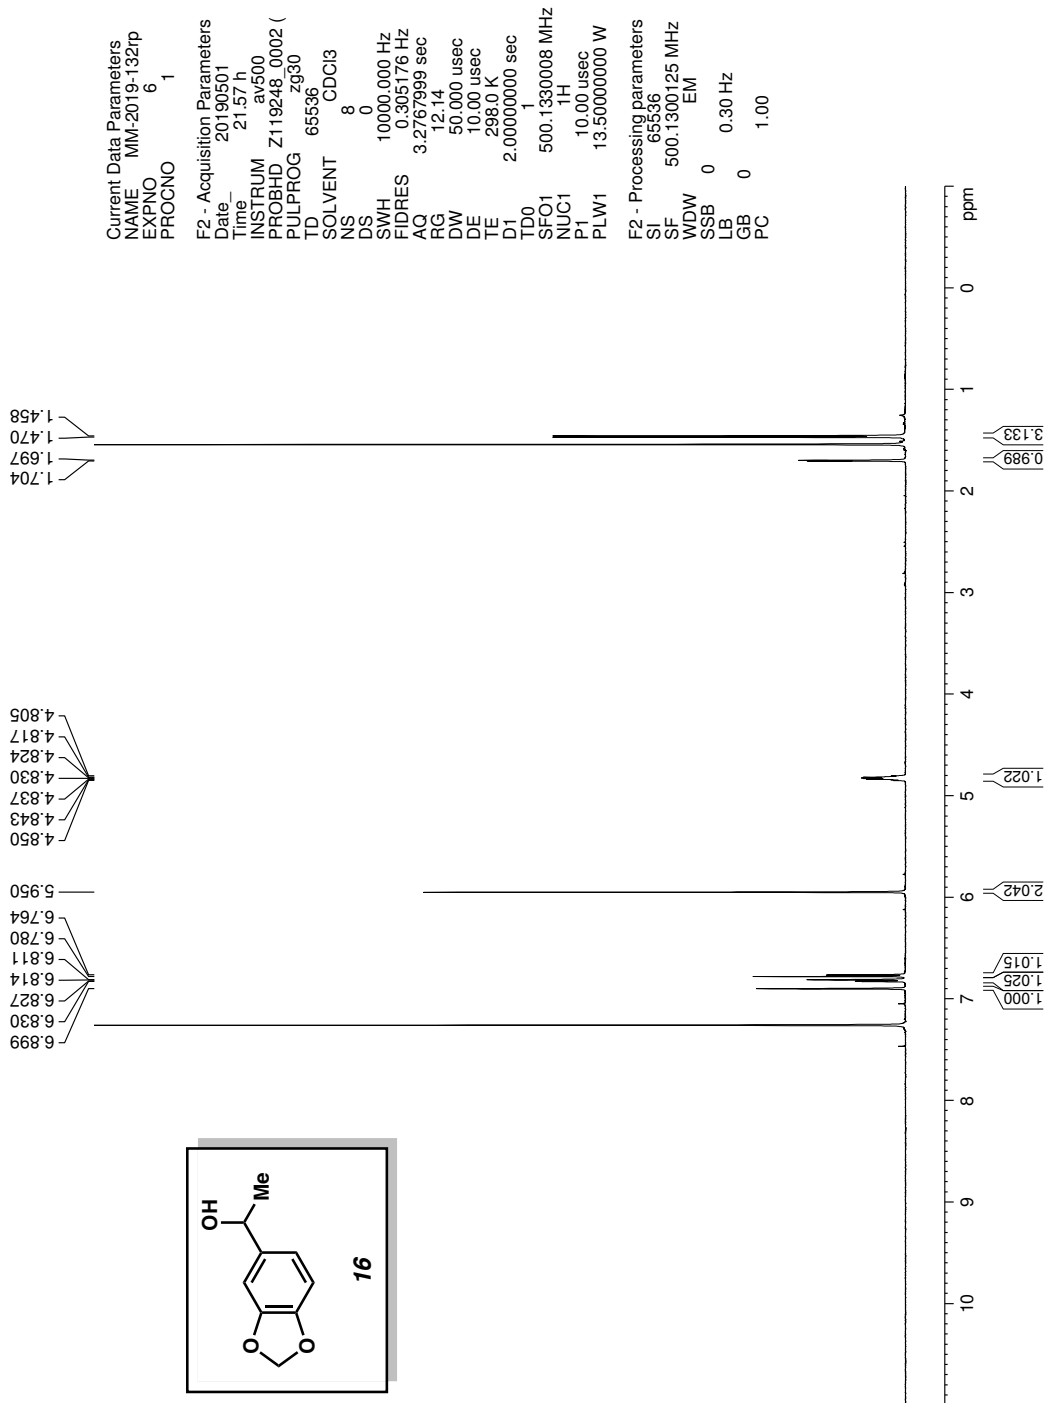

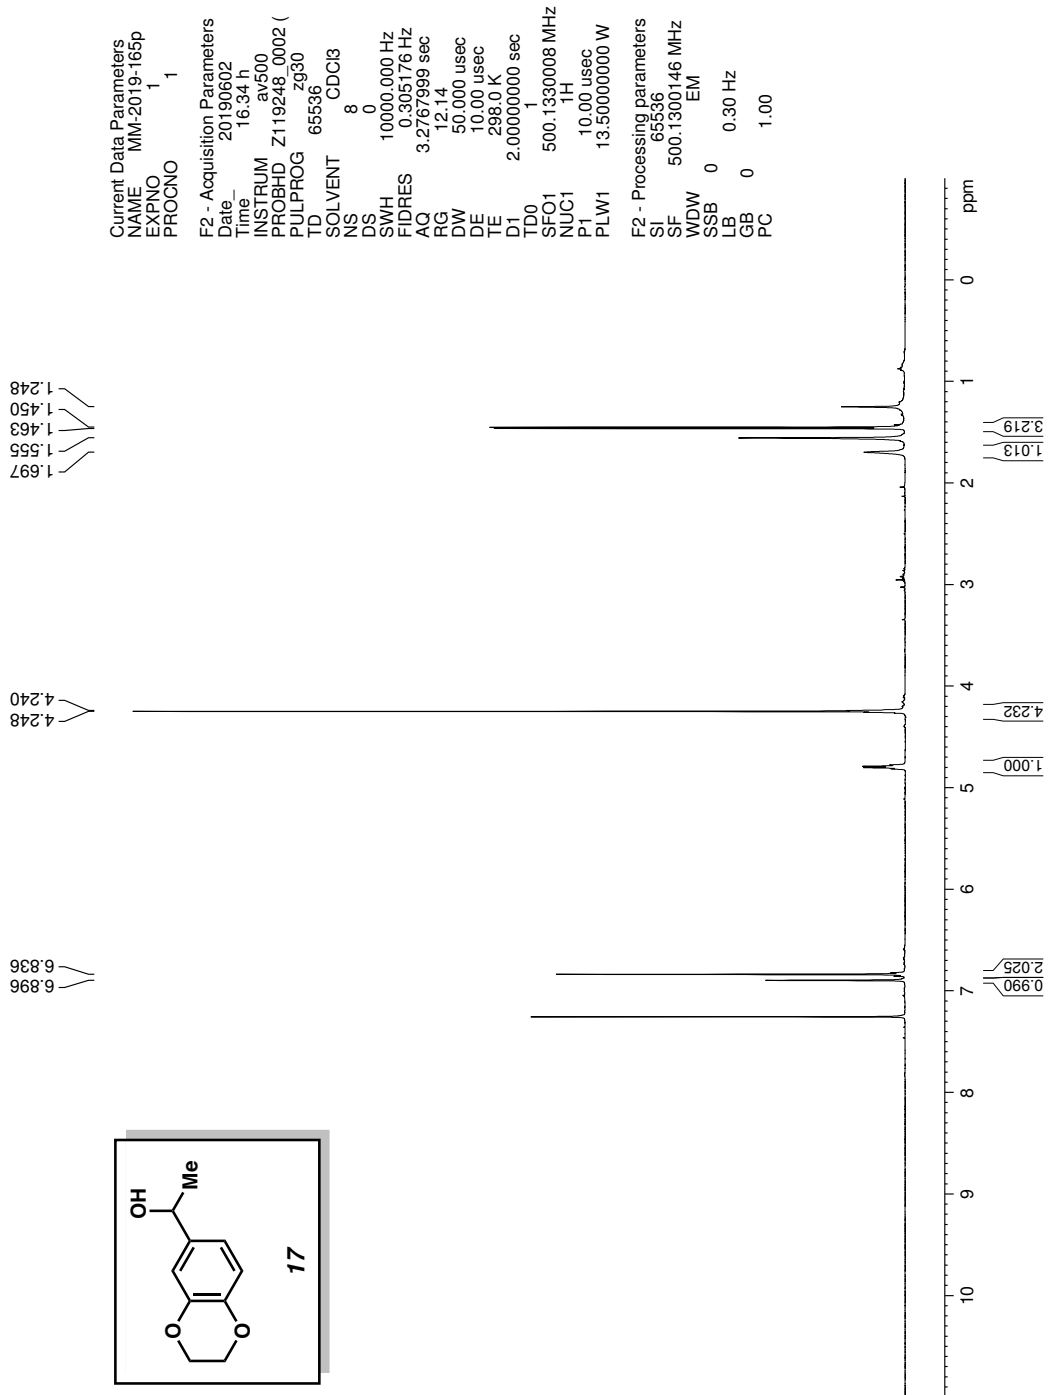

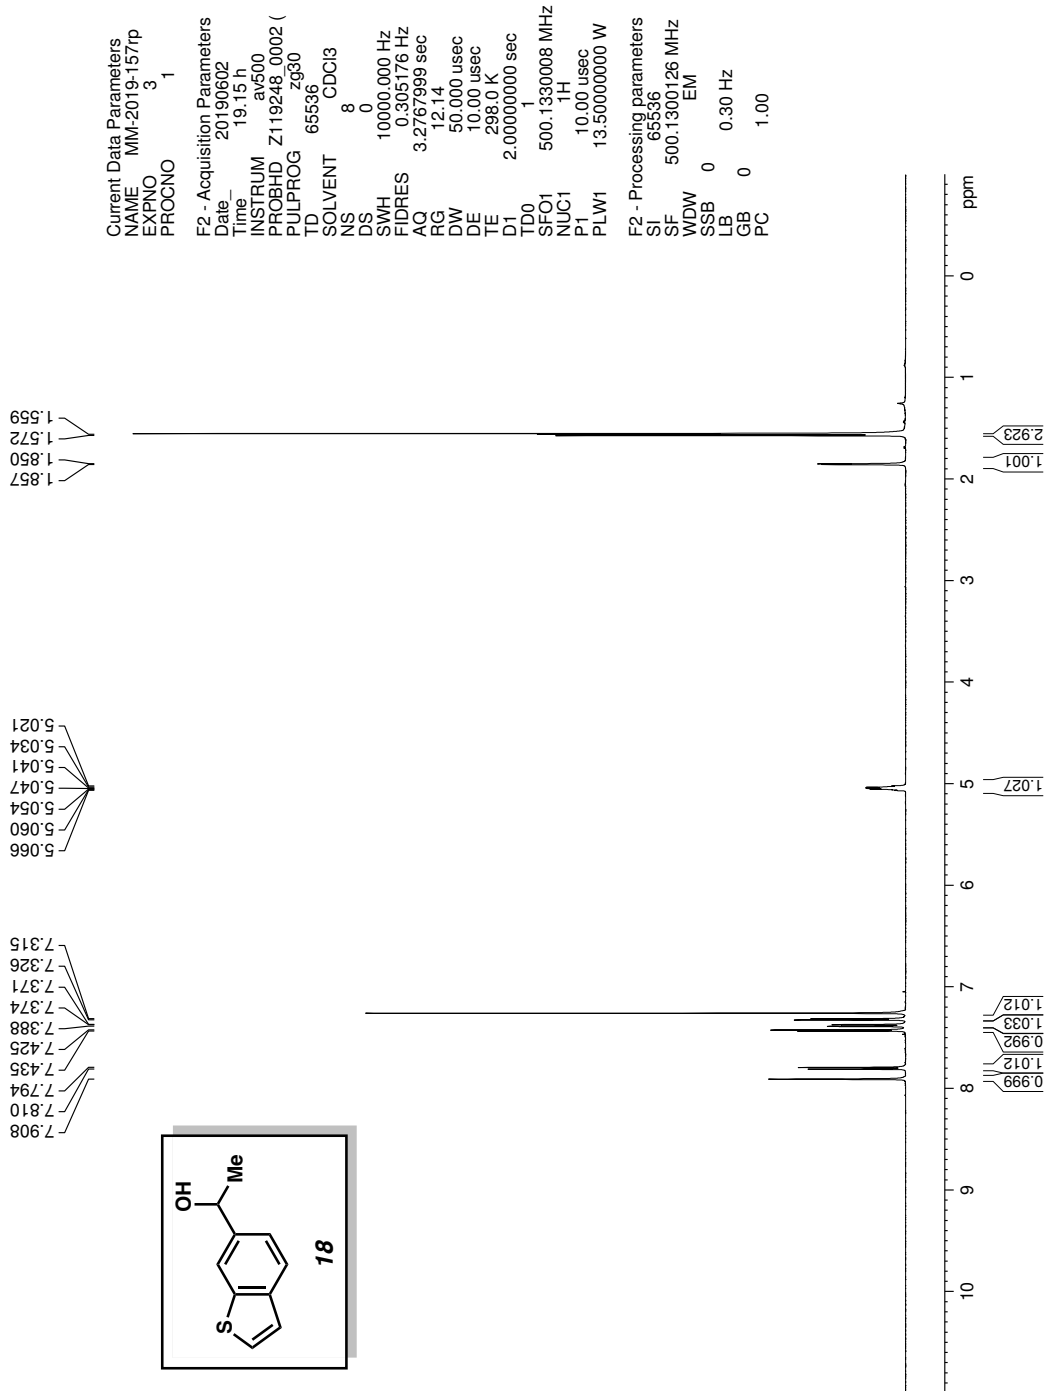

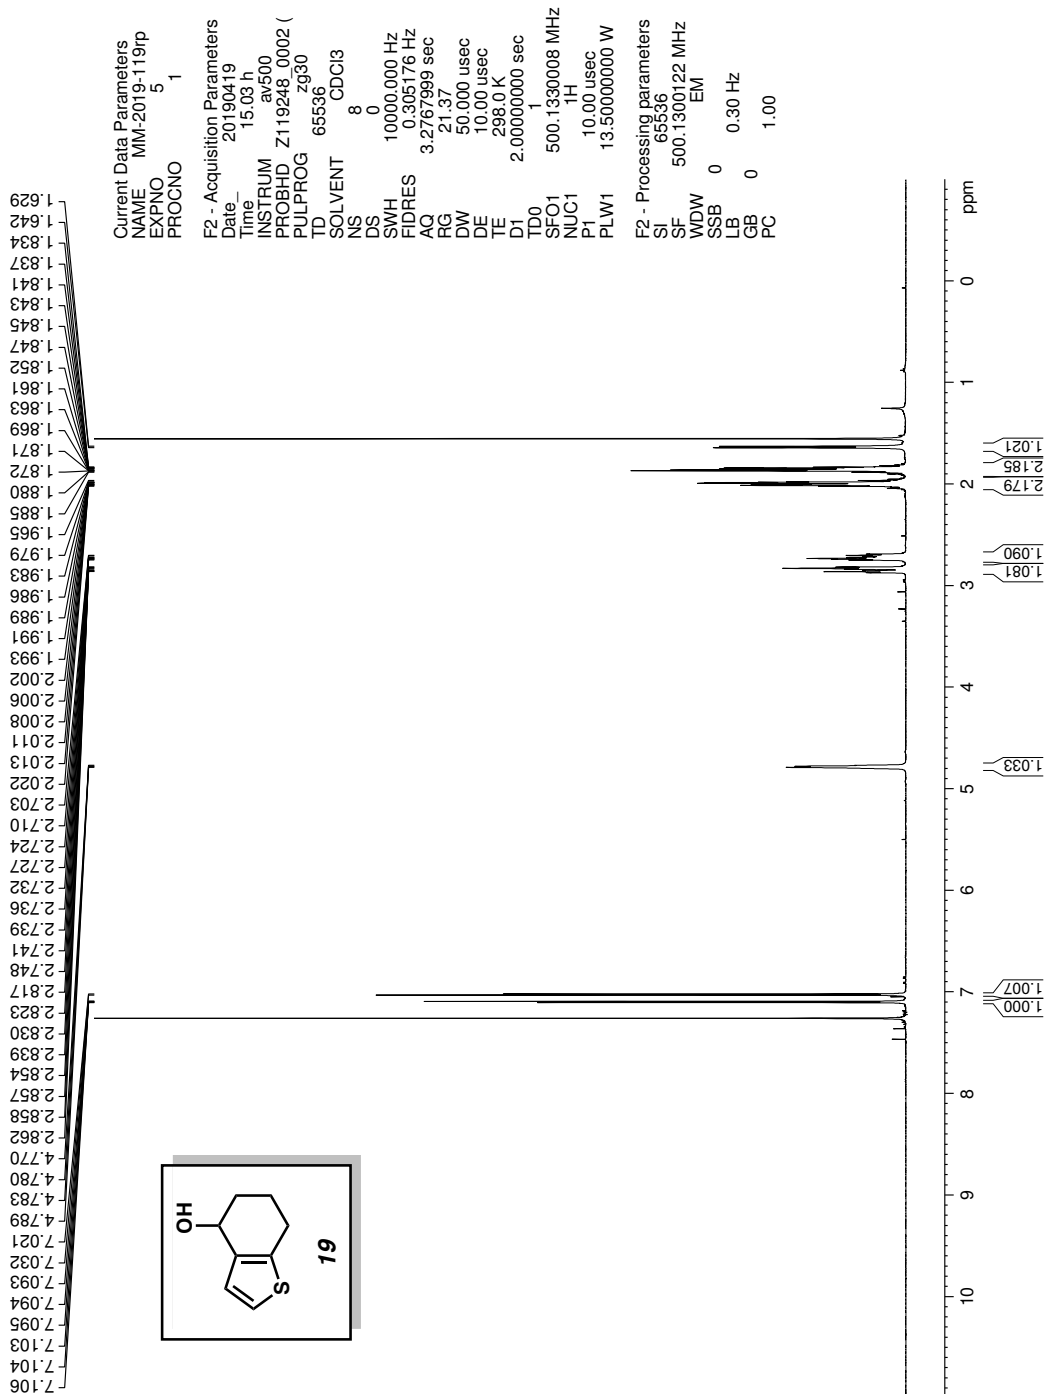

# <sup>13</sup>C NMR Spectra

Current Data Parameters  
 NAME MM-2019-159p  
 EXPNO 6  
 PROCNO 1

F2 - Acquisition Parameters  
 Date\_ 20190711  
 Time\_ 11.28 h  
 INSTRUM av500  
 PROBHD Z119248\_0002 (zpgp930)  
 PULPROG zgpg30  
 TD 65536  
 SOLVENT CDCl3  
 NS 304  
 DS 2  
 SWH 31250.000 Hz  
 FIDRES 0.953674 Hz  
 AQ 1.0485760 sec  
 RG 204.54  
 DW 16.000 usec  
 DE 28.00 usec  
 TE 298.0 K  
 D1 2.00000000 sec  
 D11 0.03000000 sec  
 TD0 1  
 SFO1 125.7722511 MHz  
 NUC1 13C  
 P1 10.50 usec  
 PLW1 23.00000000 W  
 SFO2 500.1330008 MHz  
 NUC2 1H  
 CPDPRG2 waltz16  
 PCPD2 80.00 usec  
 PLW2 13.50000000 W  
 PLW12 0.21094000 W  
 PLW13 0.10610000 W

F2 - Processing parameters  
 SI 131072  
 SF 125.7577723 MHz  
 WDW EM  
 SSB 0  
 LB 0 1.00 Hz  
 GB 0  
 PC 1.40

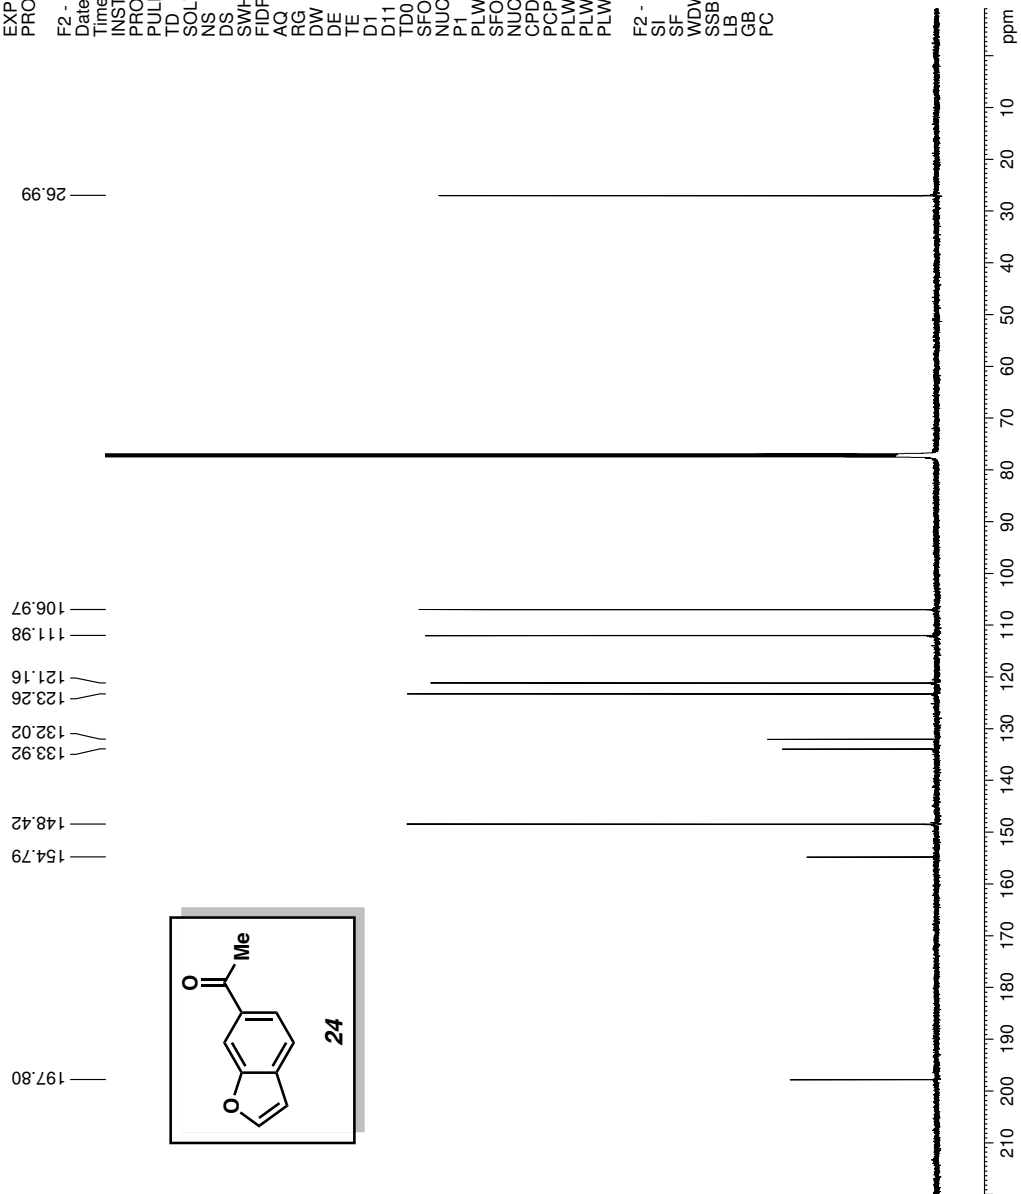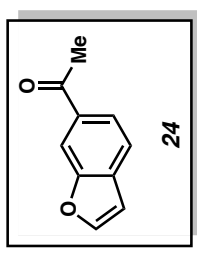

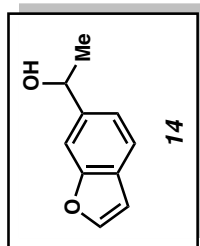

Current Data Parameters  
 NAME MM-2019-146rrp  
 EXPNO 6  
 PROCNO 1

F2 - Acquisition Parameters  
 Date\_ 20190711  
 Time 11:48 h  
 INSTRUM av500  
 PROBHD Z119248\_0002 (zpgg30)  
 PULPROG zgpg30  
 TD 65536  
 SOLVENT CDCl3  
 NS 312  
 DS 2  
 SWH 31250.000 Hz  
 FIDRES 0.953674 Hz  
 AQ 1.0485760 sec  
 RG 204.54  
 DW 16.000 usec  
 DE 28.000 usec  
 TE 298.0 K  
 D1 2.00000000 sec  
 D11 0.03000000 sec  
 TD0 1  
 SFO1 125.772511 MHz  
 NUC1 13C  
 P1 10.50 usec  
 PLW1 23.00000000 W  
 SFO2 500.1330008 MHz  
 NUC2 1H  
 CPDPRG2 waltz16  
 PCPD2 80.00 usec  
 PLW2 13.50000000 W  
 PLW12 0.21094000 W  
 PLW13 0.10610000 W

F2 - Processing parameters  
 SI 131072  
 SF 125.757723 MHz  
 WDW EM  
 SSB 0  
 LB 1.00 Hz  
 GB 0  
 PC 1.40

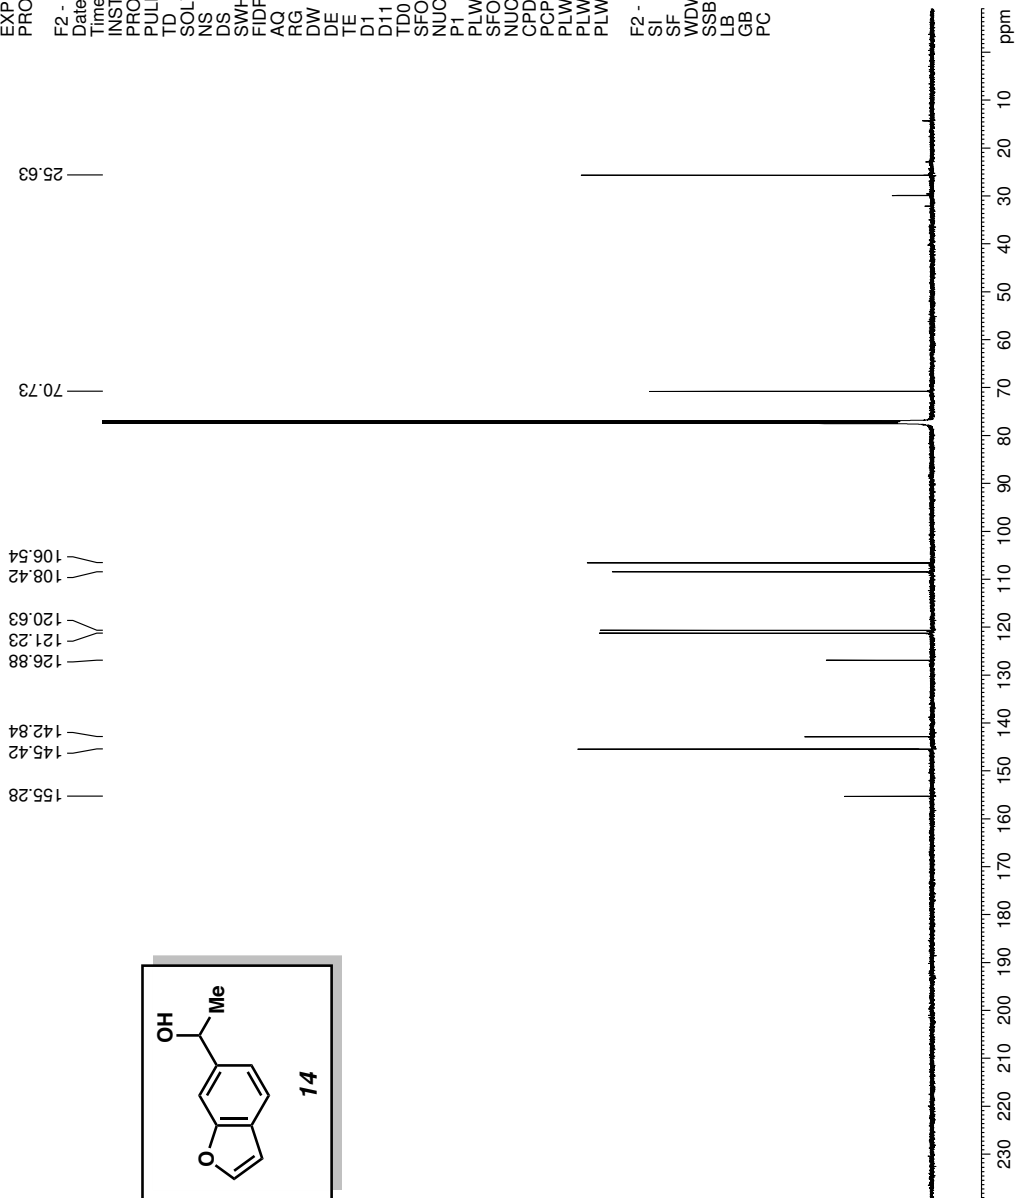

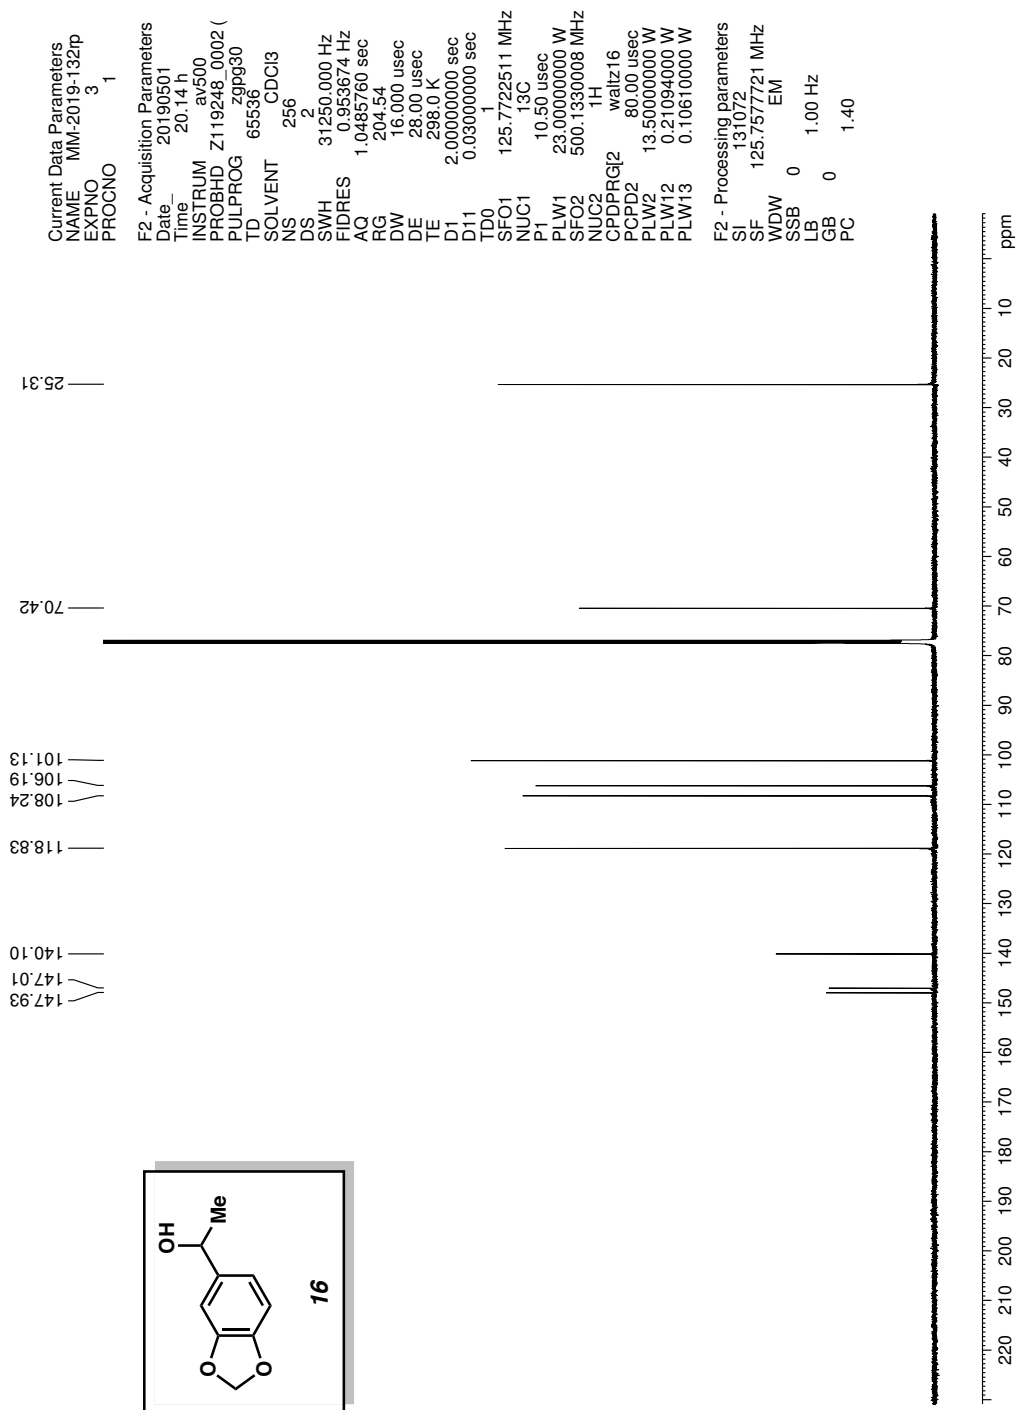



Current Data Parameters  
 NAME MM-2019-157p  
 EXPNO 50  
 PROCNO 1

F2 - Acquisition Parameters  
 Date\_ 20190604  
 Time 9.12  
 INSTRUM av400  
 PROBHD 5 mm PABBO BB/  
 PULPROG zgpg30  
 TD 65536  
 SOLVENT CDCl3  
 NS 512  
 DS 0  
 SWH 25252.525 Hz  
 FIDRES 0.385323 Hz  
 AQ 1.2976128 sec  
 RG 189.85  
 DW 19.800 usec  
 DE 6.50 usec  
 TE 298.7 K  
 D1 2.0000000 sec  
 D11 0.0300000 sec  
 TD0 1

==== CHANNEL f1 =====  
 SFO1 100.6243395 MHz  
 NUC1 13C  
 P1 10.00 usec  
 PLW1 52.00000000 W

==== CHANNEL f2 =====  
 SFO2 400.1324008 MHz  
 NUC2 1H  
 CPDPRG2 waltz16  
 PCPD2 90.00 usec  
 PLW2 13.00000000 W  
 PLW12 0.36110000 W  
 PLW13 0.29249999 W

F2 - Processing parameters  
 SI 65536  
 SF 100.6127572 MHz  
 WDW EM  
 SSB 0  
 LB 1.00 Hz  
 GB 0  
 PC 1.40

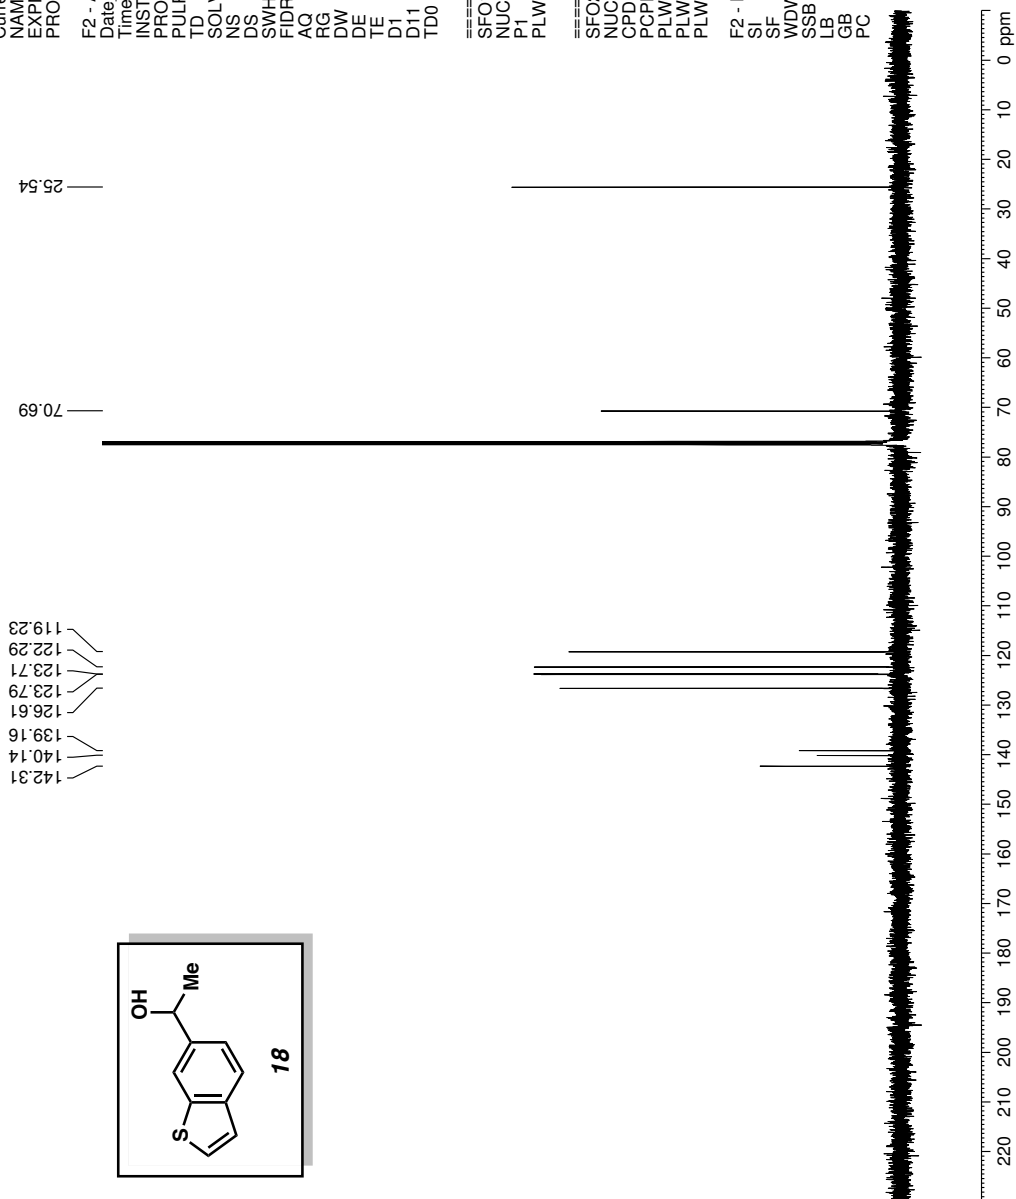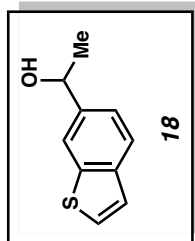

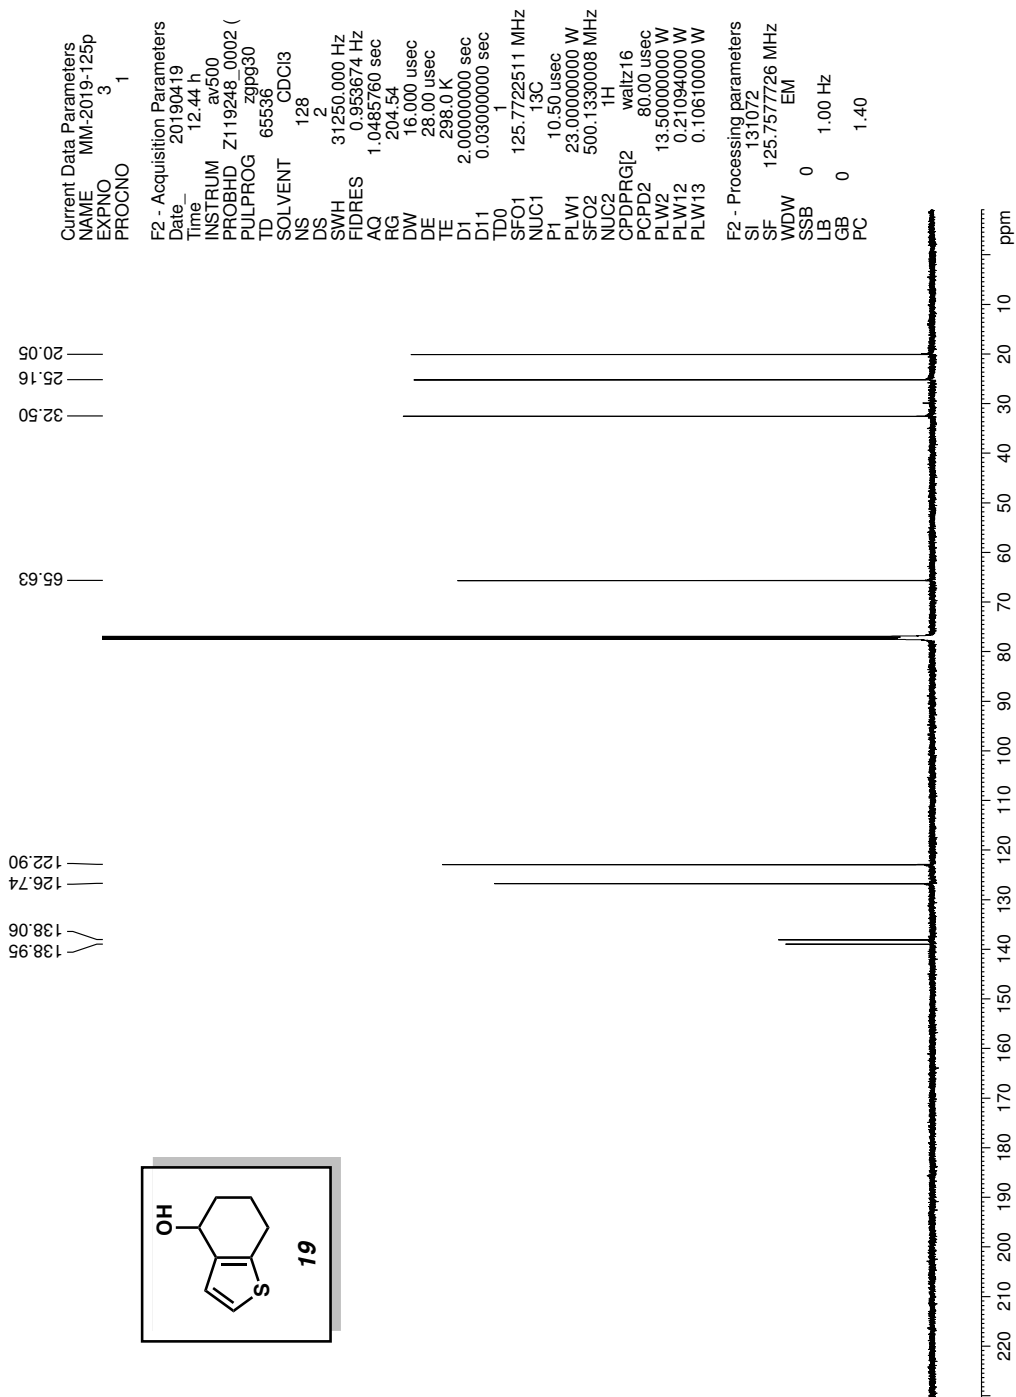

Supplement: NIHMS1580875-supplement-supporting_info.pdf [file NIHMS1580875-supplement-supporting_info.pdf]
